# Supplementary material for: Protocol for a cluster randomised trial evaluating a multifaceted intervention starting preconceptionally—Early Interventions to Support Trajectories for Healthy Life in India (EINSTEIN): a Healthy Life Trajectories Initiative (HeLTI) Study
Source: PubMed Central journal article supplement — BMJ Open. 2021 Feb 16;11(2):e045862. doi: 10.1136/bmjopen-2020-045862 (PMC7888364; doi:10.1136/bmjopen-2020-045862), 2021-02-16
Supplement: bmjopen-2020-045862.draft_revisions.pdf [file bmjopen-2020-045862.draft_revisions.pdf]

# BMJ Open

BMJ Open is committed to open peer review. As part of this commitment we make the peer review history of every article we publish publicly available.

When an article is published we post the peer reviewers' comments and the authors' responses online. We also post the versions of the paper that were used during peer review. These are the versions that the peer review comments apply to.

The versions of the paper that follow are the versions that were submitted during the peer review process. They are not the versions of record or the final published versions. They should not be cited or distributed as the published version of this manuscript.

BMJ Open is an open access journal and the full, final, typeset and author-corrected version of record of the manuscript is available on our site with no access controls, subscription charges or pay-per-view fees (<http://bmjopen.bmj.com>).

If you have any questions on BMJ Open's open peer review process please email [info.bmjopen@bmj.com](mailto:info.bmjopen@bmj.com)

# BMJ Open

**Protocol for a cluster randomised trial evaluating a multi-faceted intervention starting preconceptionally - Early Interventions to Support Trajectories for Healthy Life in India (EINSTEIN). A Healthy Life Trajectories Initiative (HeLTI) Study.**

|                               |                                                                                                                                                                                                                                                                                                                                                                                                                                                                                                                                                                                                                                                                                                                                                                                                                                                                                                                                                                                                                                                                                                                                                                                                                                                                                                                                                                                                                                                                                                                                                                                                                                                                                                                                                                                                                                                                                                                                                                                            |
|-------------------------------|--------------------------------------------------------------------------------------------------------------------------------------------------------------------------------------------------------------------------------------------------------------------------------------------------------------------------------------------------------------------------------------------------------------------------------------------------------------------------------------------------------------------------------------------------------------------------------------------------------------------------------------------------------------------------------------------------------------------------------------------------------------------------------------------------------------------------------------------------------------------------------------------------------------------------------------------------------------------------------------------------------------------------------------------------------------------------------------------------------------------------------------------------------------------------------------------------------------------------------------------------------------------------------------------------------------------------------------------------------------------------------------------------------------------------------------------------------------------------------------------------------------------------------------------------------------------------------------------------------------------------------------------------------------------------------------------------------------------------------------------------------------------------------------------------------------------------------------------------------------------------------------------------------------------------------------------------------------------------------------------|
| Journal:                      | <i>BMJ Open</i>                                                                                                                                                                                                                                                                                                                                                                                                                                                                                                                                                                                                                                                                                                                                                                                                                                                                                                                                                                                                                                                                                                                                                                                                                                                                                                                                                                                                                                                                                                                                                                                                                                                                                                                                                                                                                                                                                                                                                                            |
| Manuscript ID                 | bmjopen-2020-045862                                                                                                                                                                                                                                                                                                                                                                                                                                                                                                                                                                                                                                                                                                                                                                                                                                                                                                                                                                                                                                                                                                                                                                                                                                                                                                                                                                                                                                                                                                                                                                                                                                                                                                                                                                                                                                                                                                                                                                        |
| Article Type:                 | Protocol                                                                                                                                                                                                                                                                                                                                                                                                                                                                                                                                                                                                                                                                                                                                                                                                                                                                                                                                                                                                                                                                                                                                                                                                                                                                                                                                                                                                                                                                                                                                                                                                                                                                                                                                                                                                                                                                                                                                                                                   |
| Date Submitted by the Author: | 15-Oct-2020                                                                                                                                                                                                                                                                                                                                                                                                                                                                                                                                                                                                                                                                                                                                                                                                                                                                                                                                                                                                                                                                                                                                                                                                                                                                                                                                                                                                                                                                                                                                                                                                                                                                                                                                                                                                                                                                                                                                                                                |
| Complete List of Authors:     | <p>Kumaran, Kalyanaraman; University of Southampton, MRC Lifecourse Epidemiology Unit; CSI Holdsworth Memorial Hospital, Epidemiology Research Unit</p> <p>Krishnaveni, Ghattu ; CSI Holdsworth Memorial Hospital, Epidemiology Research Unit</p> <p>Suryanarayana, Kumar; Swami Vivekananda Memorial Hospital</p> <p>Prasad, Manohar; Swami Vivekananda Memorial Hospital</p> <p>Antoniamy, Belavendra; Christian Medical College and Hospital Vellore, Biostatistics</p> <p>Atkinson, S; McMaster University,</p> <p>Balasubramaniam, Ramaswamy; Swami Vivekananda Memorial Hospital</p> <p>Bandsma, Robert</p> <p>Bhutta, Zulfiqar; SickKids Center for Global Child Health, Centre for Global Child Health</p> <p>Chandak, Giriraj; Centre for Cellular and Molecular Biology CSIR,</p> <p>Comelli, Elena; University of Toronto Department of Nutritional Sciences</p> <p>Davidge, Sandra; University of Alberta, Edmonton, Canada, Department of Obstetrics &amp; Gynecology,</p> <p>Dennis, CindyLee; University of Toronto, Lawrence S. Bloomberg Faculty of Nursing</p> <p>Hammond, Geoffrey ; University of British Columbia, Department of Cellular &amp; Physiological Sciences</p> <p>Jha, Prabhat; CGHR, University of Toronto</p> <p>Joseph, K.; The University of British Columbia,</p> <p>Joshi, S ; Bharati Vidyapeeth Deemed University Medical College,</p> <p>Krishna, Murali; Foundation for Research and Advocacy in Mental Health (FRAMe)</p> <p>Lee , Kang ; University of Toronto, Department of Applied Psychology and Human Development,OISE</p> <p>Lye, Stephen; Lunenfeld-Tanenbaum Research Institute</p> <p>McGowan , Patrick ; University of Toronto Scarborough, Canada, Department of Biological Sciences,</p> <p>Nepomnaschy, Pablo A.; Simon Fraser University Faculty of Health Sciences</p> <p>Padvetnaya, Vivek; OP Jindal Global University Jindal School of Government and Public Policy</p> <p>Pyne, Saumyadipta ; University of Pittsburgh</p> |

|           |                                                                                                                                                                                                                                                                                                                                                                                                                                                                                                                                                                                                                                                                                                                                                                                                                                                                                                                                                                                                                                                                                                                                                                                                                                           |
|-----------|-------------------------------------------------------------------------------------------------------------------------------------------------------------------------------------------------------------------------------------------------------------------------------------------------------------------------------------------------------------------------------------------------------------------------------------------------------------------------------------------------------------------------------------------------------------------------------------------------------------------------------------------------------------------------------------------------------------------------------------------------------------------------------------------------------------------------------------------------------------------------------------------------------------------------------------------------------------------------------------------------------------------------------------------------------------------------------------------------------------------------------------------------------------------------------------------------------------------------------------------|
|           | Sachdev, Harshpal; Sitaram Bhartia Institute of Science and Research, Department of Paediatrics<br>Sahariah, Sirazul Amin; Centre for the Study of Social Change<br>Singhal, Nalini; University of Calgary, Canada, Department of Paediatrics<br>Trasler, Jacquetta; McGill University, Departments of Pediatrics, Human Genetics, and Pharmacology and Therapeutics<br>Yajnik, Chittaranjan; KEM Hospital Pune, Diabetes Unit, KEMHRC<br>Baird, Janis; University of Southampton, MRC Epidemiology Resource Centre<br>Barker, Mary; University of Southampton, MRC Lifecourse Epidemiology Unit<br>Martin, Marie-Claude; Alliance for Human Development; Lunenfeld-Tanenbaum Research Institute, Sinai Health System, Toronto, Canada<br>Husain, Nusrat; The University of Manchester, School of Medicine<br>Sellen, Daniel; University of Toronto,<br>Fall, Caroline; University of Southampton, MRC Lifecourse Epidemiology Unit<br>Shah, Prakesh; Mount Sinai Hospital and University of Toronto, Department of Paediatrics<br>Mathews, Stephen; Lunenfeld-Tanenbaum Research Institute, Sinai Health System, Alliance for Human Development; University of Toronto, Departments of Obstetrics & Gynecology, Physiology, and Medicine |
| Keywords: | PUBLIC HEALTH, PREVENTIVE MEDICINE, EPIDEMIOLOGY                                                                                                                                                                                                                                                                                                                                                                                                                                                                                                                                                                                                                                                                                                                                                                                                                                                                                                                                                                                                                                                                                                                                                                                          |
|           |                                                                                                                                                                                                                                                                                                                                                                                                                                                                                                                                                                                                                                                                                                                                                                                                                                                                                                                                                                                                                                                                                                                                                                                                                                           |

SCHOLARONE™  
Manuscripts

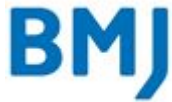

I, the Submitting Author has the right to grant and does grant on behalf of all authors of the Work (as defined in the below author licence), an exclusive licence and/or a non-exclusive licence for contributions from authors who are: i) UK Crown employees; ii) where BMJ has agreed a CC-BY licence shall apply, and/or iii) in accordance with the terms applicable for US Federal Government officers or employees acting as part of their official duties; on a worldwide, perpetual, irrevocable, royalty-free basis to BMJ Publishing Group Ltd ("BMJ") its licensees and where the relevant Journal is co-owned by BMJ to the co-owners of the Journal, to publish the Work in this journal and any other BMJ products and to exploit all rights, as set out in our [licence](#).

The Submitting Author accepts and understands that any supply made under these terms is made by BMJ to the Submitting Author unless you are acting as an employee on behalf of your employer or a postgraduate student of an affiliated institution which is paying any applicable article publishing charge ("APC") for Open Access articles. Where the Submitting Author wishes to make the Work available on an Open Access basis (and intends to pay the relevant APC), the terms of reuse of such Open Access shall be governed by a Creative Commons licence – details of these licences and which [Creative Commons](#) licence will apply to this Work are set out in our licence referred to above.

Other than as permitted in any relevant BMJ Author's Self Archiving Policies, I confirm this Work has not been accepted for publication elsewhere, is not being considered for publication elsewhere and does not duplicate material already published. I confirm all authors consent to publication of this Work and authorise the granting of this licence.

**Protocol for a cluster randomised trial evaluating a multi-faceted intervention starting preconceptionally - Early Interventions to Support Trajectories for Healthy Life in India (EINSTEIN). A Healthy Life Trajectories Initiative (HeLTI) Study.**

**Authors:**

Kalyanaraman Kumaran DM<sup>1,2</sup>, Ghattu V. Krishnaveni PhD<sup>1</sup>, Kumar Gavali Suryanarayana MD<sup>3,4</sup>, Manohar Prabhu Prasad MPH<sup>3,4</sup>, Antonisamy Belavendra PhD<sup>5</sup>, Stephanie Atkinson PhD<sup>6</sup>, Ramaswamy Balasubramaniam MD<sup>4</sup>, Robert H. J. Bandsma PhD<sup>7,8</sup>, Zulfiqar A. Bhutta PhD<sup>9,10</sup>, Giriraj Ratan Chandak PhD<sup>11</sup>, Elena M. Comelli PhD<sup>12,13</sup>, Sandra T. Davidge PhD<sup>14</sup>, Cindy-Lee Dennis PhD<sup>15,16</sup>, Geoffrey L. Hammond PhD<sup>17</sup>, Prabat Jha DPhil<sup>18</sup>, K.S. Joseph MD PhD<sup>19,20</sup>, Sadhana R. Joshi PhD<sup>21</sup>, Murali Krishna PhD<sup>22</sup>, Kang Lee PhD<sup>23</sup>, Stephen Lye PhD<sup>24,25</sup>, Patrick McGowan PhD<sup>26</sup>, Pablo Nepomnaschy PhD<sup>27</sup>, Vivek Padvetnaya DPhil<sup>28</sup>, Saumyadipta Pyne PhD<sup>29,30</sup>, Harshpal Singh Sachdev MD<sup>31</sup>, Sirazul Ameen Sahariah MD<sup>32</sup>, Nalini Singhal MD<sup>33</sup>, Jacquetta Trasler PhD<sup>34,35</sup>, Chittaranjan S Yajnik MD<sup>36</sup>, Janis Baird PhD<sup>2,37</sup>, Mary Barker PhD<sup>2,37</sup>, Marie-Claude Martin PhD<sup>24</sup>, Nusrat Husain MD<sup>38</sup>, Daniel Sellen PhD<sup>39,40</sup>, Caroline Fall DM<sup>2</sup>, Prakeskumar Shah MD<sup>41,42</sup>, Stephen G. Matthews PhD<sup>24,25</sup>

**Corresponding author:** Kalyanaraman Kumaran

Postal address: Epidemiology Research Unit, CSI Holdsworth Memorial Hospital, Mandi Mohalla, Mysore 570001 India

E-mail: [kumarank@hotmail.com](mailto:kumarank@hotmail.com); [kk@mrc.soton.ac.uk](mailto:kk@mrc.soton.ac.uk)

Tel: +91-821-2521651

Fax: +91-821-2565607

**Author affiliations:**

1. Epidemiology Research Unit, CSI Holdsworth Memorial Hospital, Mysore, India
2. MRC Lifecourse Epidemiology Unit, University of Southampton, UK
3. Vivekananda Memorial Hospital, Saragur, India
4. Swami Vivekananda Youth Movement, Mysore, India
5. Department of Biostatistics, Christian Medical College, Vellore, India
6. Department of Paediatrics, McMaster University, Hamilton, Canada
7. Division of Gastroenterology, Hepatology and Nutrition, The Hospital for Sick Children, Toronto, Canada
8. Department of Paediatrics and Nutritional Sciences, University of Toronto, Canada
9. Centre for Global Child Health, The Hospital for Sick Children, Toronto, Canada
10. Department of Nutritional Sciences and Division of Epidemiology, Dalla Lana School of Public Health, University of Toronto, Canada
11. CSIR - Centre for Cellular and Molecular Biology, Hyderabad, India
12. Department of Nutritional Sciences, University of Toronto, Canada
13. Joannah and Brian Lawson Centre for Child Nutrition
14. Department of Obstetrics & Gynecology, University of Alberta, Edmonton, Canada
15. Lawrence S. Bloomberg Faculty of Nursing and Department of Psychiatry, University of Toronto, Canada
16. Li Ka Shing Knowledge Institute, St. Michael's Hospital, Toronto, Canada
17. Department of Cellular & Physiological Sciences, University of British Columbia, Vancouver, Canada
18. Epidemiology Division, Dalla Lana School of Public Health, University of Toronto, Canada
19. Department of Obstetrics & Gynecology, University of British Columbia, Vancouver, Canada

20. School of Population and Public Health, University of British Columbia, Vancouver, Canada
21. Nutritional Medicine Division, Interactive Research School for Health Affairs, Bharati Vidyapeeth, Pune, India
22. Foundation for Research and Advocacy in Mental Health (FRAMe), Mysore, India.
23. Department of Applied Psychology and Human Development, OISE/University of Toronto, Canada
24. Alliance for Human Development; Lunenfeld-Tanenbaum Research Institute, Sinai Health System, Toronto, Canada
25. Departments of Obstetrics & Gynecology, Physiology, and Medicine, University of Toronto, Canada
26. Department of Biological Sciences, University of Toronto Scarborough, Canada
27. Faculty of Health Sciences, Simon Fraser University, Burnaby, Canada
28. Jindal School of Government and Public Policy, O.P. Jindal Global University, Sonipat, India
29. Public Health Dynamics Lab and Department of Biostatistics, University of Pittsburgh, USA
30. Health Analytics Network, Pennsylvania, USA
31. Department of Pediatrics and Clinical Epidemiology, Sitaram Bhartia Institute of Science and Research, New Delhi, India
32. Centre for the Study of Social Change, Mumbai, India
33. Department of Paediatrics, University of Calgary, Canada
34. Departments of Pediatrics, Human Genetics, and Pharmacology and Therapeutics, McGill University, Montreal, Canada
35. Research Institute of the McGill University Health Centre, Montreal, Canada
36. Diabetes Unit, King Edward Memorial Hospital and Research Centre, Pune, India
37. NIHR Southampton Biomedical Research Centre, UK
38. Division of Psychology and Mental Health, University of Manchester, UK
39. Joannah and Brian Lawson Centre for Child Nutrition, Department of Nutritional Sciences, University of Toronto, Canada
40. Department of Anthropology, Dalla Lana School of Public Health, University of Toronto, Canada
41. Department of Paediatrics, Mount Sinai Hospital, Toronto, Canada
42. Department of Paediatrics and Institute of Health Policy Management and Evaluation, University of Toronto, Canada

**Key words:** Developmental origins of health and disease (DOHaD), Multi-faceted intervention; Pre-conceptual intervention; Non-communicable diseases; India

**Word count:** 4348

## ABSTRACT

**Introduction:** The Healthy Life Trajectories Initiative (HeLTI) is an international consortium comprising four harmonised but independently powered trials to evaluate whether an integrated intervention starting pre-conceptionally will reduce non-communicable disease risk in their children. This paper describes the protocol of the India study.

**Methods and analysis:** The study set in rural Mysore will recruit ~6000 married women over the age of 18 years. The village-based cluster randomised design has three arms (pre-conception, pregnancy and control; 35 villages per arm). The longitudinal multi-faceted intervention package will be delivered by community health workers and comprise: a) measures to optimise nutrition; b) a group parenting programme integrated with cognitive behavior therapy; c) a lifestyle behavior change intervention to support women to achieve a diverse diet, exclusive breastfeeding for the first 6 months, timely introduction of diverse and nutritious infant weaning foods, and adopt appropriate hygiene measures; and d) the reduction of environmental pollution focusing on indoor air pollution and toxin avoidance.

The primary outcome is adiposity in children at age 5 years, measured by fat mass index. We will report on a host of intermediate and process outcomes. We will collect a range of biospecimens including blood, urine, stool, and saliva from the mothers, as well as umbilical cord blood, placenta and specimens from the offspring.

An intention-to-treat analysis will be adopted to assess the effect of interventions on outcomes. We will also undertake process and economic evaluations to determine scalability and public health translation.

**Ethics and dissemination:** The study has been approved by the institutional ethics committee of the lead institute. Findings will be published in peer-reviewed journals. We will interact with policy makers at local, national and international agencies to enable translation. We will also share the findings with the participants and local community through community meetings, newsletters and local radio.

**Trial registration:** To be registered with CTRI and ISRCTN

**Keywords:** Non-communicable disease; Developmental Origins of Health and Disease; Pre-conceptional intervention; Childhood adiposity; Child development, Healthy Life Trajectory Initiative (HeLTI)

## STRENGTHS AND LIMITATIONS OF THIS STUDY

- The study will evaluate, for the first time in India, whether a multi-faceted intervention starting pre-conceptionally and continuing through pregnancy, infancy and early childhood reduces risk factors for non-communicable disease in the offspring. The design will also allow assessment of the relative benefits and costs of starting the intervention pre-conceptionally versus starting in pregnancy, in addition to standard care.
- The study builds upon 35 years of local work which has resulted in strong community engagement and rapport.
- Process and economic evaluations will help in scalability while the use of local community workers will aid translation; the choice of a setting which is undergoing socio-economic transition has major public health implications.
- Given the long-term nature of the study, unblinding of selected outcomes will occur at the end of each phase to enable interim mechanistic analyses and thereby maximise the study potential.
- Due to the study design, effectiveness of individual components of the intervention cannot be evaluated.



## INTRODUCTION

Non-communicable diseases (NCDs) which include cardiovascular disease (CVD), type 2 diabetes and depression are major causes of death and disability globally<sup>1,2</sup> and are rising rapidly in low- and middle-income countries (LMICs)<sup>1-3</sup>. The rising burden of cardiometabolic disease in LMICs is accompanied by a growing recognition of the burden of mental health disorders. Depression is the leading neuropsychiatric cause of disease burden globally and in LMICs<sup>4</sup>, and by 2020 it is projected to be the second leading cause of burden of disease<sup>5</sup>.

In India, an estimated 65 million people have diabetes and a further 77 million are pre-diabetic, making it one of the diabetes epicentres of the world<sup>6,7</sup>. Unchecked, the population with diabetes is expected to reach 109 million by 2035<sup>6</sup>. A review showed that 13% of young people aged 1-16 years in India experience mental health disorders<sup>8</sup>. In later life, ~3.7 million people over 60 years of age have dementia; this number is expected to double by 2030 and triple by 2050<sup>9</sup>. These chronic diseases have significant economic implications; the treatment and related costs amount to INR 19914 (US\$398) and INR 43285 (\$865) per person per year for diabetes<sup>10</sup> and dementia<sup>11</sup>, respectively.

The developmental origins of health and disease (DOHaD) hypothesis suggests that adversity during early life influences adult NCD risk<sup>12,13</sup>. DOHaD research suggests that NCD risk is influenced not only by exposure to the well-known 'load' factors such as adult obesity and physical inactivity, but also by the 'capacity' of key metabolic tissues, which is acquired during early development<sup>14</sup>. It is now well established that low birth weight (LBW), poor infant nutrition, and rapid childhood weight gain and obesity are risk factors for poor health trajectories and development of NCDs in later life<sup>15,16</sup>.

Undernutrition (including widespread micronutrient deficiencies) remains a significant problem in India. In children under 5, the prevalence of stunting is ~35%; wasting ~17%; underweight ~33%, and anaemia ~41%<sup>17</sup>. In women aged 15-49 years, 23% are underweight (body mass index, BMI < 18.5 kg/m<sup>2</sup>) while ~53% are anaemic<sup>18</sup>. These factors are reflected in a high prevalence of LBW (< 2500g) in ~21% of the 26 million babies born in India each year<sup>19</sup>. Rates of obesity in children and adults are also increasing in India; it is estimated that ~12% of children and ~21% of women of reproductive age are overweight or obese (adult BMI > 25 kg/m<sup>2</sup>)<sup>18</sup>.

Application of DOHaD principles therefore offers a novel approach to tackling NCDs by delivering interventions in an integrated manner across the lifecourse: in adolescent or young women to ensure they approach pregnancy in optimum health; in pregnant women to ensure a healthy pregnancy and safe delivery; and in infancy and childhood to prevent excessive childhood adiposity and promote child development.

### The Healthy Life Trajectories Initiative

In this context, the Healthy Life Trajectories Initiative (HeLTI) was launched as a joint initiative between the Canadian Institute of Health Research, the Department of Biotechnology of India, the South African Medical Research Council, the National Science Foundation of China and the World Health Organisation. This programme follows a DOHaD approach, focusing on reducing the long-term risk of NCDs through interventions that target the interaction between environmental factors and genes during pre-conception, conception, fetal life, infancy and early childhood. The HeLTI programme comprises four separate but harmonised randomised controlled trials in Mysore (India), Shanghai (China), Soweto (South Africa), and two provinces in Canada. The HeLTI interventions are multi-faceted; the rationale is that previous single intervention trials (e.g. multiple micronutrient supplementation) have shown only modest benefits for pregnancy and child outcomes and that multiple interventions are needed to create impact in populations with multiple environmental and social disadvantages. Previous trials have usually started after

confirmation of pregnancy, in the late first trimester, and have therefore missed the important peri-conceptional and early pregnancy processes of epigenetic change, placentation and organogenesis; starting pre-conceptionally will address these issues. The long-term view is unique, with all funders intending to support for 10 years so that the impact of the interventions not only on pregnancy outcomes, but also on cardiometabolic and neurodevelopmental outcomes in the children can be assessed.

The HeLTI consortium has a collective governance structure for the management of the trials. The two co-lead PIs of each of the four HeLTI trials form an over-arching Research Committee (RC), with rotating chairpersons, responsible for overall project management and oversight, liaising with working groups and reporting to the HeLTI Council (comprising representatives from all the funders and a WHO secretariat). Working groups, including investigators from all countries chaired by one of the lead PIs, develop harmonised protocols, covering biospecimens, data collection, interventions, cohort management and retention, and data management. Each country project team has a Steering Committee, comprising the two PIs and selected co-PIs, which deals with day to day operations and reports to the RC, as well as liaising with participating institutions and community representatives. The four HeLTI trials have a common Data Monitoring and Safety Committee comprising independent international experts, with representation from the four countries involved. The WHO will monitor the trial conduct.

### **The India Study**

We report the protocol for the Indian study, Early Interventions to Support Trajectories for Healthy Life in India (EINSTEIN) in this paper. Research by our group has shown that part of the increased NCD risk in Indians comes from changes in fetal body composition. The undernourished Indian newborn is typically light and thin (average birth weight 2.7kg) and has a low lean body mass, but is disproportionately adipose (the 'thin-fat' Indian)<sup>20,21</sup>. This phenotype persists through childhood and into adult life, and is associated with diabetes and CVD at relatively low levels of obesity. The effects of early life undernutrition are exacerbated by poor weight gain in infancy and rapid childhood weight gain even in the absence of obesity<sup>22</sup>.

We have specifically chosen a rural population where obesity is currently uncommon, but undernutrition is common. This population is representative of a large section of the Indian population where economic transition has started and is likely to benefit most from interventions to improve early development (capacity) as well as those that reduce the post-natal obesogenic effects of transition (load).

### **METHODS AND ANALYSIS**

Our overarching aim is to investigate whether an integrated intervention starting pre-conceptionally and continuing at appropriate points across the lifecourse (pregnancy, infancy and childhood) will reduce childhood adiposity and the risk for NCDs as well as improve measures of child neurodevelopment.

#### **Patient and public involvement**

We undertook extensive community engagement and formative work over a period of ~18 months with the local community which included face-to-face meetings and focus group discussions. This work helped to finalise our intervention package and delivery methods, and dissemination plans.

#### **Subjects**

Our proposed study will be set in rural Mysore, in HD Kote and Saragur Taluks about 50 km from Mysore city in southern India. The population is characterised by subsistence farming, poor nutritional status, low levels of literacy particularly among women, and limited access to specialist health services. Approximately 25% of women are underweight, 19% are overweight, and 45% are anaemic<sup>23</sup>. Less than 60% of infants are exclusively breast fed for

1  
2  
3 6 months<sup>24</sup>. Over 60% of children under five are anaemic and less than two-thirds are fully  
4 immunised<sup>23,24</sup>. The prevalence of both stunting and underweight in children under five is  
5 ~38%<sup>24</sup>. Sanitation and hygiene facilities are limited and toilets are mostly shared. The local  
6 area receives potable water from taps, most commonly from shared taps situated in streets.  
7 Borewells are also a common source of water. The population is relatively stable, minimizing  
8 loss to follow up. Signs of transition are evident; village shops sell high-energy, high-salt,  
9 high-sugar snacks and drinks which are mainly consumed by children and young people.  
10 Better transport links have increased access to nearby towns and cities, allowing people to  
11 seek employment in small/cottage industries.  
12

13  
14 We have selected 105 villages based on population size (from ~250 in the area) around our main  
15 field site, the Vivekananda Memorial Hospital (VMH) in Saragur, and will allocate 35 villages to  
16 each group, using a standard computerised randomisation programme. We will include women  
17 who are over the age of 18, married, have no children or one child, and are planning to have a  
18 child within the next two years. We will particularly focus on newly married women, who have a  
19 high likelihood of pregnancy within a year.  
20

### 21 **Study design**

22 The study is a community-based, cluster-randomised intervention with three arms (preconception,  
23 pregnancy and control), with individual villages forming the basis for the cluster. Women in all  
24 three arms will be recruited together, pre-conceptionally for baseline measurements. The  
25 longitudinal multi-faceted intervention will be delivered by trained community health workers  
26 (CHWs), which will allow future scalability.  
27

28 All participants will receive iron and folic acid tablets during pregnancy as per Indian guidelines.  
29 Calcium is routinely prescribed in pregnancy by many obstetricians. We will not interfere with  
30 routine care provided by the women's obstetricians. We will liaise with local doctors to ensure that  
31 they are aware of the study and the supplements their patients are taking, so that the women do  
32 not receive 'excess' micronutrients. All women will also receive menstrual hygiene advice and will  
33 be provided with a supply of menstrual pads to promote appropriate hygiene practices.  
34  
35

### 36 **Intervention details**

#### 37 Group 1 (Preconception arm):

38 *Micronutrient supplementation:* Women will receive daily micronutrient supplement tablets from  
39 recruitment preconceptionally, throughout pregnancy and during breast feeding. Given the high  
40 likelihood of multiple deficiencies, the composition will be based on the WHO/UNICEF/UNU  
41 international multiple micronutrient preparation (UNIMMAP).  
42

43 *Lifestyle behavior change support:* Women will receive support from CHWs trained in Healthy  
44 Conversation Skills (HCS), in group settings. The principles of the group work are in Appendix 1.  
45 HCS is a communication technique developed at the University of Southampton by our wider team  
46 for use by health workers to support behaviour change in socio-economically disadvantaged  
47 women<sup>25</sup>. This technique has been translated to LMIC settings; in a recent feasibility study  
48 involving our group in South Africa, community health workers have been successfully trained in  
49 HCS to support young women to improve their diets and lifestyles. The group work emphasises  
50 the role of increasing self-efficacy in promoting behaviour change. It is based on the understanding  
51 that providing participants with knowledge alone is not sufficient to change their behaviour unless  
52 they are also motivated and empowered to change. The aim will be to promote a diverse diet,  
53 achieve a normal body weight, and achieve an adequate intake of micronutrients before and  
54 during pregnancy, and while breastfeeding. CHWs will provide support postnatally to encourage  
55 exclusive breast feeding for the first 6 months and the timely introduction of diverse and nutritious  
56 infant weaning foods. Women will be educated about the importance of using safe water for  
57 feeding their infants after six months, and advised to use boiled and cooled water. They will  
58 receive support to ensure that their infants are fully vaccinated, and that they adopt appropriate  
59 hygiene measures, particularly hand washing after using the toilet, changing 'nappies', and before  
60

1  
2  
3 preparing food, eating and feeding their infants. During the pre-conception stage, the group work  
4 will be held at approximately monthly intervals. There will be six modules, with the first module  
5 serving as an introductory and general health module. This will be delivered first to all women in  
6 the arm. The other five modules will be delivered cyclically and address diet, physical activity and  
7 sleep, environmental exposure and hygiene, mental health, and preparing for pregnancy.  
8

9  
10 *Group parenting and cognitive behaviour intervention (Learning Through Play Plus {LTP*  
11 *Plus})*: LTP Plus is a group parenting programme, integrated with a cognitive behaviour  
12 therapy intervention (Thinking Healthy Programme) designed to address perinatal  
13 depression and improve child development in LMIC settings<sup>26,27</sup>. It is a manual assisted, low-  
14 literacy, potentially sustainable programme whose activities enhance children's  
15 development. It simultaneously promotes attachment security through building parents'  
16 ability to be sensitive to their children's cues, and be actively involved in their children's  
17 development. These sessions will be delivered in phases which will not only match the  
18 woman's pace, but also the gestational period antenatally and the infant's developmental  
19 stages postnatally. This two-pronged psychosocial participatory group intervention will help  
20 mothers to cope with stress, reduce depression and provide information and strategies that  
21 they need to nurture their children's health and development. This will consist of a total of ten  
22 sessions, three during pregnancy and seven postnatally. LTP Plus uses a standardized  
23 manual and the material will be delivered by CHWs.  
24

25  
26 *Avoiding environmental pollution*: We will provide advice and information on avoidance of  
27 environmental pollutants particularly indoor smoke (cooking and smoking). We will facilitate LPG  
28 (liquefied petroleum gas) connections actively through a recently introduced government scheme  
29 which provides subsidized stoves and fuel. We will also address exposure to, and safe handling of  
30 pesticides.  
31

#### 32 Group 2 (Pregnancy arm):

33 Women in this group will receive the same package of interventions described above, but starting  
34 only after they become pregnant, which, in practice, will mean late in the first trimester. Last  
35 menstrual period dates will be monitored monthly and women will be offered a urine pregnancy  
36 test when they report missing two consecutive periods.  
37

#### 38 Group 3 (Control arm):

39 Women in this group will receive an enhanced standard of care. In addition to encouraging  
40 vaccinations (two doses of tetanus toxoid) during pregnancy, provision of 100 tablets of iron and  
41 folate, and promoting institutional delivery, they will have a similar number of contact sessions with  
42 CHWs untrained in our behaviour change and parenting interventions. They will receive standard  
43 advice on healthy lifestyle during pregnancy and postnatally, supported by information leaflets  
44 (mainly pictorial and using simple language); these will include advice on breastfeeding,  
45 immunizations, and infant weaning foods.  
46

#### 47 **Outcomes and assessments**

48 The primary outcome at age 5 years in the children (across all HeLTI cohorts) is adiposity as  
49 measured by fat mass index (fat mass/height<sup>2</sup>), using DXA (dual x-ray absorptiometry). Other key  
50 outcomes at 5-6 years in the children include:  
51

- 52 • Overweight and obesity (OWO) as assessed by BMI and indicators of body composition  
53 and distribution (waist circumference, skinfold thickness)
- 54 • Glucose metabolism as measured by fasting venous plasma glucose concentration
- 55 • Resting systolic blood pressure
- 56 • Child development as assessed using modified Kaufman battery, validated for Indian  
57 settings.  
58

59 Baseline data on all participants as well as data throughout the study at intervals will be collected  
60

(Table 1). Additional phenotypic data will be collected in a subset (ranging between 50-200 individuals per arm, depending on the assessment). We will also collect

### Sample size and power

All the HeLTI studies have calculated their sample size using a minimum power of 80% at 5% significance level to detect a 0.25 standard deviation (SD) difference in offspring fat mass index at 5 years of age between intervention and control groups. We intend to recruit ~6000 initially at baseline. We anticipate 50% will become pregnant within two years (based on data from our formative work). Allowing a 5% pregnancy loss and 20% drop out/loss to follow-up rate, we will have ~750 children in each arm available for follow up to assess our primary outcome (~22 per per village). Assuming an intra-cluster correlation of 0.03, this gives ~95% power to detect a 0.25 SD difference in fat mass between the intervention and control groups and ~80% power to detect sex differences. If pregnancy rates are lower than expected, we will undertake a second round of recruitment at the end of the first year.

### Data analysis

As the main outcomes for the study are fat mass index, OWO rate, resting blood pressure, fasting glucose and neurodevelopmental outcomes at age 5 years, and as most children will achieve these ages only in cycle 2 (5-10 years of project), analyses at the end of cycle 1 (0-5 years of project) will explore the effects of the intervention on child anthropometric measures (at birth and serially) and neurodevelopmental outcomes. We will also assess effects on maternal anthropometry, mental health, behavioural risk factors for adiposity/obesity and glycemia. Process indicators including recruitment, retention, and indicators of programme delivery in the intervention group/s will also be determined.

An intention-to-treat analysis will be used for the key outcomes, based on all viable pregnancies. Analysts will be blinded to the study groups. Unblinding will occur after analysis or on the advice of the independent Data Monitoring Committee. We will use mixed models with a cluster-specific approach and robust error estimators adjusted for prespecified potential risk factors related to individual clusters and subjects (such as, locality and level of care, maternal age, parity, pregnancy complications, smoking, and socioeconomic status). First, standard data screening/cleaning procedures will be conducted including the extent and pattern of missing data. We will assess the comparability at randomization of the treatment groups using descriptive analyses. The distribution of modifiable risk factors for childhood obesity, poor cardiometabolic and neurodevelopmental outcomes at baseline, and their changes over time will be assessed according to study group. For women in the intervention groups, we will evaluate the number of scheduled intervention visits, and compliance with micronutrient supplements and attendance at group sessions.

At the end of the 1st cycle of the project, we expect the youngest children to be 1 year of age. We will evaluate the impact of the intervention on all indicators of potential risk factors including weight-for-length at 1 year, birthweight and proportions of SGA/LGA, head and abdominal circumferences at birth and 1 year of age, as well as on indicators of perinatal morbidity/mortality. We will also assess the impact of the intervention on maternal gestational weight gain, the proportion meeting international gestational weight gain guidelines, breastfeeding status as well as on maternal diet and physical activity in the preconception and pregnancy periods.

At 5 years of age in the children, we will assess the effect of the intervention on fat mass index (the primary outcome). Other anthropometric outcomes to be assessed at this time include OWO, BMI and centiles and adiposity (skinfold thickness, arm circumference). We will also assess the effect of the intervention on glucose metabolism, blood pressure and neurodevelopmental outcomes.

Mixed models with random intercept/slope effects and fixed effects (for the intervention) will

1  
2  
3 be used to estimate the intervention effect. Due to possible heterogeneity of effects for key  
4 outcomes according to the time of initiation of the intervention (e.g. preconception versus  
5 pregnancy) we will conduct a subgroup analysis stratifying by this variable, testing for  
6 heterogeneity. For a 'per-protocol' analysis, we will categorize clusters as high or low  
7 according to the compliance with implementation of the intervention. Sensitivity analyses will  
8 be performed to assess the influence of losses to follow-up. We will use data on all  
9 participants (i.e. with viable pregnancies at inclusion) through multiple imputation.  
10

11 *Economic evaluation:* We will undertake cost-effectiveness analysis, from a healthcare payer  
12 perspective. We will collect data related to healthcare resource use during the study,  
13 including costs of the intervention, CHWs' time, and healthcare use during pregnancy,  
14 delivery and infant/child care. Unit costs will be estimated using the activity-based costing  
15 method. Our measure of effectiveness will be based on our primary outcome; we will  
16 estimate the relative cost-effectiveness of the pre-conception strategy, pregnancy strategy  
17 and standard care; an incremental analysis will be conducted comparing the three  
18 strategies.  
19

20  
21 *Process evaluation:* Evaluation will focus on implementation, mechanisms of impact, and  
22 context. Assessment of implementation will focus on determining what is delivered and how  
23 delivery is achieved. We will measure fidelity of intervention delivery by observing CHWs in  
24 their contacts with intervention group participants, focusing on their use of HCS and LTP  
25 Plus and the competencies they demonstrate. We will also observe the contact between  
26 CHWs and control participants to record the nature of interactions. We will monitor  
27 intervention dose by recording the frequency and duration of contact between participants  
28 and CHWs. To understand the mechanisms through which the intervention brings about  
29 change in our specified outcomes, we will assess the acceptability of the intervention, and  
30 women's experiences of contact with CHWs using interviews and focus groups. In assessing  
31 context, we will aim to identify any factor that might act as a barrier or facilitator to  
32 intervention implementation or effects. This will include local and national policy, local  
33 service configuration and provision, socio-demographic and environmental factors within the  
34 villages taking part in the trial, and consultation with key stakeholders. We will also survey  
35 non-respondents and those who drop out to gain an understanding of why they did not  
36 consent to take part in the study or dropped out during the course of the trial.  
37  
38

### 39 **Expected outcomes:**

40 The study will provide robust evidence whether an integrated multi-faceted intervention  
41 starting pre-conceptionally and continuing through pregnancy and postnatally reduces risk  
42 factors for NCD in the offspring. The use of culturally-appropriate interventions will allow  
43 scalability if successful. The process and economic evaluations will aid in assessment of  
44 translation potential. We will also be able to assess the relative costs and benefits of starting  
45 interventions pre-conceptionally versus starting in pregnancy. The study will generate  
46 extensive data and build a biorepository which can be used by other researchers within India  
47 and elsewhere.  
48

## 49 **ETHICS AND DISSEMINATION**

### 50 **Patient and public involvement**

51 We undertook extensive community engagement and formative work over a period of ~18  
52 months with the local community which included face-to-face meetings and focus group  
53 discussions. This work helped to finalise our intervention package and delivery methods, and  
54 dissemination plans.  
55  
56

### 57 **Recruitment of participants**

58 The study has been approved by the CSI Holdsworth Memorial Hospital Ethics Committee,  
59 (Ref CSIHMH/ERU2019/1). Any protocol modifications will be reported to the committee and  
60

1  
2  
3 approval will be sought for any significant amendments. Community engagement is key to  
4 the success of our programme and we have engaged with the community leaders, village  
5 elders and local groups, particularly women's self-help groups. We held community  
6 engagement meetings at village level to explain the study and clarify any queries people  
7 may have. VMH is also actively engaged with local women's self-help groups; we will  
8 interact with them throughout the project to not only provide updates of the project, but also  
9 to incorporate their feedback into the conduct of the study.  
10

11 The families will be given verbal information initially followed by written information in  
12 Kannada (local language). The participants will be encouraged to ask questions before  
13 obtaining written consent. It will be made clear that they are free to withdraw at any time  
14 from the study.  
15

### 16 **Anonymity and/or confidentiality**

17 Every precaution will be taken to respect the privacy of the women and the confidentiality of  
18 their information. We follow research governance practice in accordance with Indian and  
19 international guidelines. All data are coded and anonymised before analysis. Strict  
20 confidentiality is maintained throughout; hard copy data are stored in locked filing cabinets  
21 and in locked rooms, with limited access. Digital data are stored on password-protected  
22 encrypted computers, with access only by authorised members of the research team.  
23 Biological samples are stored in locked freezers in a secure facility.  
24  
25

### 26 **Potential risks/harm to participants in the study**

27 None of the interventions or investigations present risks to the participants. Micronutrient  
28 supplements have been previously used in community trials and are recommended in the  
29 Lancet series on Maternal and Child Nutrition<sup>28</sup> and in the 2015 Cochrane Review on  
30 micronutrient supplementation in pregnancy<sup>29</sup>. While we do not expect any adverse effects  
31 due to the supplements, the participants will be monitored for adverse events. The LTP Plus  
32 programme has been used previously in various LMIC settings and has been shown to  
33 reduce maternal depression; there have been no reported adverse outcomes. HCS have  
34 also been used previously in community settings without any adverse outcomes. Serious  
35 adverse events will be investigated by a medical doctor and reported to the PI and local Co-  
36 PIs. Reports will also be submitted to the local institutional ethics committee and the  
37 sponsor. Data on adverse events will also be submitted to the independent Data Monitoring  
38 Committee. All tests are done under medical supervision and appropriate referral  
39 arrangements are in place for issues requiring medical attention.  
40  
41

### 42 **Dissemination**

43 Participants will receive reports of the relevant physical and biological measurements. If  
44 there are any abnormal results, participants will be referred to appropriate medical  
45 specialists in VMH for further management and advice.  
46

47 To maximise the scientific impact, we will engage with the scientific community by presenting  
48 our work at major national and international conferences, and by publishing in high-quality  
49 peer-reviewed journals, ensuring open access. We will engage with other research groups  
50 working on maternal and child health, and develop collaborative opportunities even beyond  
51 the duration of the project. Our data will be available to the scientific community after we  
52 publish our main findings.  
53

54 We also will interact with policy makers at local, national and international health agencies,  
55 and governments to enable translation of our findings into policy. Members of our  
56 collaborative group are linked into national and international policy advisory groups including  
57 local, state and national governmental committees in India and Canada, the WHO and  
58 Unicef, and we will ensure relevant findings are disseminated through these groups to  
59 influence policy. We have met with local health and government officials in the district  
60

councils to discuss the public health importance of our study. Their support will be invaluable in future translation. Research findings will be translated into project summaries and policy briefs that capture the major findings and suggest practical policy changes, based on the evidence provided by the project. Recommendations to policy makers will also focus on cost-effectiveness. These documents will be published in English as well as local languages.

The results have implications for all mothers and children, and we will engage with our communities, the wider public, and the mass media. VMH runs a radio station and we will use broadcasts to engage with the local community and provide information and updates. We will explain the relevance of our research to our participants and feedback important results to them through six-monthly newsletters and also by community meetings on an annual basis. We will also publicise the study on our institutional websites and use mass media to ensure that our research findings reach a wide public audience.

In summary, our study will determine whether a longitudinal integrated intervention starting pre-conceptionally improves cardiometabolic and neurodevelopmental outcomes in the next generation. The results will have significant public health implications which can be generalised to other similar settings. The range of biospecimens being collected will allow us to understand causal mechanisms.

**Table 1: List of assessments to be carried out at various time points**

| <b>Mothers</b>  | <b>Baseline</b>                                                                                                                                                                                                                                                                                                                                                                                                                                                                                                                              |
|-----------------|----------------------------------------------------------------------------------------------------------------------------------------------------------------------------------------------------------------------------------------------------------------------------------------------------------------------------------------------------------------------------------------------------------------------------------------------------------------------------------------------------------------------------------------------|
| Physical health | Anthropometry: weight, height; Body composition: Bioimpedance, skinfolds (subset), DXA (subset), stable isotope (subset);<br>Blood pressure: Digital sphygmomanometer                                                                                                                                                                                                                                                                                                                                                                        |
| Biospecimen     | Blood sample: Plasma, serum, DNA, RNA (subset)                                                                                                                                                                                                                                                                                                                                                                                                                                                                                               |
| Questionnaires  | Diet: Food frequency questionnaire (FFQ), 24-hour food recall, diet diversity and food security questionnaires; Physical activity: Global Physical Activity Questionnaire (GPAQ); Sleep: Pittsburgh Sleep Quality Index (PSQI); General Self Efficacy Scale (GSES); Generalised Anxiety Disorder-7 (GAD-7); Patient Health Questionnaire -9 (PHQ-9); Adverse Childhood Experience (ACE) questionnaire<br>Sociodemography; Socioeconomic status (Standard of Living Index; SLI); Medical/ treatment/drug history; Smoking and alcohol history |
|                 | <b>Pregnancy</b>                                                                                                                                                                                                                                                                                                                                                                                                                                                                                                                             |
| Physical health | Anthropometry: weight; Body composition: Bioimpedance, stable isotope (subset); Blood pressure: Digital sphygmomanometer                                                                                                                                                                                                                                                                                                                                                                                                                     |
| Biospecimen     | Blood: Oral glucose tolerance test (OGTT), plasma, serum, DNA, RNA (subset);<br>Urine; Saliva (subset)                                                                                                                                                                                                                                                                                                                                                                                                                                       |
| Questionnaires  | FFQ, 24-hour food recall, diet diversity and food security; GPAQ; PSQI; GSES; GAD-7; Edinburgh Postnatal Depression Scale (EPDS); Social Provision Scale; Breast-feeding Self-efficacy Scale; Perceived Stress Scale<br>Sociodemography; Socioeconomic status (SLI); Medical/ treatment/drug history; Smoking and alcohol history                                                                                                                                                                                                            |
|                 | <b>Delivery</b>                                                                                                                                                                                                                                                                                                                                                                                                                                                                                                                              |
|                 | Weight; Stool/rectal swab (subset); Delivery details                                                                                                                                                                                                                                                                                                                                                                                                                                                                                         |
|                 | Serial postnatal follow-up (up to 60 months)                                                                                                                                                                                                                                                                                                                                                                                                                                                                                                 |
| Physical health | Anthropometry: Weight; Body composition: DXA (subset), stable isotope (subset); Blood pressure: Digital sphygmomanometer; OGTT; blood samples                                                                                                                                                                                                                                                                                                                                                                                                |
| Biospecimen     | Blood: plasma, serum, DNA, RNA (subset), OGTT                                                                                                                                                                                                                                                                                                                                                                                                                                                                                                |
| Questionnaires  | FFQ; 24-hour food recall, diet diversity and food security; GPAQ; PSQI; GSES; GAD-7; EPDS; PHQ-9; Social Provision Scale; Breast-feeding Self efficacy Scale; Perceived Stress Scale; Parenting Stress Index;<br>Sociodemography; Socioeconomic status (SLI); Medical/ treatment/drug history; Smoking and alcohol history                                                                                                                                                                                                                   |



|                |                                                                                                                                                                                                                                                                                                                                                                                                                                                                                                                                                                                                                                                    |
|----------------|----------------------------------------------------------------------------------------------------------------------------------------------------------------------------------------------------------------------------------------------------------------------------------------------------------------------------------------------------------------------------------------------------------------------------------------------------------------------------------------------------------------------------------------------------------------------------------------------------------------------------------------------------|
| <b>Fathers</b> | <b>Index pregnancy</b>                                                                                                                                                                                                                                                                                                                                                                                                                                                                                                                                                                                                                             |
|                | Anthropometry: Weight, height; Body composition: Bioimpedance, DXA (subset); Blood pressure: Digital sphygmomanometer<br>Blood: Plasma, serum, DNA, RNA (subset), saliva (subset)<br>FFQ; 24-hour food recall, diet diversity and food security; GPAQ; PSQI; PHQ-9<br>Sociodemography, Socioeconomic status (SLI); Medical/ treatment/drug history; Smoking and alcohol history                                                                                                                                                                                                                                                                    |
| <b>Child</b>   | <b>Birth</b>                                                                                                                                                                                                                                                                                                                                                                                                                                                                                                                                                                                                                                       |
|                | Anthropometry: Weight, length, head/arm/abdomen/chest circumference, skinfolds<br>DXA,<br>Cord blood; Placenta; Umbilical cord; Meconium                                                                                                                                                                                                                                                                                                                                                                                                                                                                                                           |
|                | <b>Birth to 12 months</b>                                                                                                                                                                                                                                                                                                                                                                                                                                                                                                                                                                                                                          |
|                | Anthropometry: Weight, length, circumferences; Body composition: DXA, stable isotope (subset)<br>Feeding history; Vaccination history; Medical/treatment/drug history<br>Stool                                                                                                                                                                                                                                                                                                                                                                                                                                                                     |
|                | <b>Serial postnatal follow-up (major follow-up at 24 and 60 months)</b>                                                                                                                                                                                                                                                                                                                                                                                                                                                                                                                                                                            |
|                | Anthropometry: Weight, length/height, circumferences; Body composition: DXA, Blood pressure; Blood samples (heel prick at 24 months and venous sample at 60 months): Plasma, serum, DNA, RNA, glycaemia<br>Feeding history; Sleep Questionnaire; Ages and stages questionnaire; Neuro-cognitive developmental tools: Developmental Assessment <i>Scale</i> for Indian Infants (DASII) at 24 months; modified Kaufmann Battery at 60 months; Executive function assessment tools; Physical activity (questionnaire and accelerometry); Screen time questionnaire;<br>General health assessment; Vaccination history; Medical/treatment/drug history |

**Acknowledgements:** We are grateful to our funders and the HeLTI Council for their support. We are indebted to the local community for their participation in the study. We acknowledge the role of the WHO in supporting the HeLTI collaboration and providing quality assurance support. We also thank the HeLTI PI Research Committee and HeLTI Research Office for the mutual support, intellectual contributions and administrative support. We also thank our respective institutions and their heads for their support and encouragement. Elena M. Comelli holds the Lawson Family Chair in Microbiome Nutrition Research at the University of Toronto.

**Authors' contributions:** All named authors were involved in study design and protocol development. KK, GVK, KGS, MPP, CHDF, PS, DS and SGM wrote the first draft of the manuscript. All authors critically reviewed the manuscript and approved the final version.

**Competing interests statement:** None of the authors declare any conflict of interest. The HeLTI Council of funders and WHO have required all Principal Investigators to complete annual Declarations of Interest and to commit to having no direct or indirect relations with the tobacco, arms and infant food industries during the course of the study.

**Funding statement:** This work is supported by the Department of Biotechnology, Government of India (BT/MED/WHO-CIHR/2014) and the Canadian Institutes of Health Research (NDN-151554). The lead institutes are the CSI Holdsworth Memorial Hospital, Mysore, India and the University of Toronto, Canada. The funders and sponsors have no direct involvement in the design and conduct of the study.

**Data sharing and access:** Data sharing and access arrangements are included in the overall HeLTI governance document. The HeLTI consortium is in the process of establishing a Data Access Portal through which investigators can view and request access to data/biospecimens within individual HeLTI country or multiple country datasets. Data access will follow country-specific guidelines and is expected to require submission of a detailed research plan (including study rationale, hypothesis, analytic methodologies and funding support to complete the study/analyses). Once the study is completed the researchers will be required to submit all analytical and derived data with metadata to be integrated into the HeLTI country datasets, so that it is available to other researchers.

## References

1. GBD 2015 Mortality and Causes of Death Collaborators. Global, regional, and national life expectancy, all-cause mortality, and cause-specific mortality for 249 causes of death, 1980–2015: a systematic analysis for the Global Burden of Disease Study 2015. *Lancet* 2016; **388**: 1459–1544.
2. Ng M, Fleming T, Robinson M *et al*. Global, regional, and national prevalence of overweight and obesity in children and adults during 1980–2013: a systematic analysis for the Global Burden of Disease Study 2013. *Lancet* 2014; **384**: 766–81.
3. NCD Risk Factor Collaboration. Worldwide trends in diabetes since 1980: a pooled analysis of 751 population-based studies with 4·4 million participants. *Lancet* 2016; **387**: 1513–30.
4. Patel V, Simon G, Chowdhary N *et al*. Packages of care for depression in low- and middle-income countries. *PLoS Med* 2009; **6**: e1000159.
5. Mathers CD, Loncar D. Projections of Global Mortality and Burden of Disease from 2002 to 2030. *PLoS Med* 2016; **3**: e442.
6. Guariguata L, Whiting DR, Hambleton I *et al*. Global estimates of diabetes prevalence for 2013 and projections for 2035. *Diabetes Res Clin Pract* 2014; **103**: 137–49.
7. Anjana RM, Pradeepa R, Deepa M *et al*. Prevalence of diabetes and prediabetes (impaired fasting glucose and/or impaired glucose tolerance) in urban and rural India: phase I results of the Indian Council of Medical Research-India DIABetes (ICMR-INDIAB) study. *Diabetologia* 2011; **54**: 3022–7.
8. Patel V, Flisher AJ, Hetrick S, McGarry P. Mental health of young people: a global public-health challenge. *Lancet* 2007; **369**: 1302–13.
9. Prince M, Bryce R, Albanese E *et al*. The global prevalence of dementia: a systematic review and meta-analysis. *Alzheimer's & Dementia* 2013; **9**: 63–75.
10. Kapur A. Economic analysis of diabetes care. *Indian J Med Res* 2007; **125**: 473–82.
11. Shaji KS, Jotheeswaran AT, Girish N *et al*. The Dementia India Report: 2010. Alzheimer's and Related Disorders Society: New Delhi, India.
12. Hales CN, Barker DJP. Type 2 (non-insulin-dependent) diabetes mellitus: the thrifty phenotype hypothesis. *Int J Epidemiol* 2013; **42**: 1215–22.
13. Hanson M, Gluckman P. Developmental origins of noncommunicable disease: population and public health implications. *Am J Clin Nutr* 2011; **94**: 1754S–1758S.
14. Wells JC, Pomeroy E, Walimbe SR, Popkin BM, Yajnik CS. The Elevated Susceptibility to Diabetes in India: An Evolutionary Perspective. *Front Public Health* 2016; **4**: 145.
15. Barker DJ, Osmond C, Kajantie E *et al*. Growth and chronic disease: findings in the Helsinki Birth Cohort. *Ann Hum Biol* 2009; **36**: 445–58.
16. Bhargava SK, Sachdev HS, Fall CH, *et al*. Relation of serial changes in childhood body-mass index to impaired glucose tolerance in young adulthood. *N Engl J Med*. 2004; **350**: 865–75.
17. Ministry of Health and Family Welfare (MoHFW), Government of India, UNICEF and Population Council. 2019. Comprehensive National Nutrition Survey (CNNS) National Report. New Delhi.
18. International Institute for Population Sciences (IIPS) and ICF. 2017. National Family Health Survey (NFHS-4), 2015–16: India. Mumbai: IIPS.
19. India State-Level Disease Burden Initiative Malnutrition Collaborators. The burden of child and maternal malnutrition and trends in its indicators in the states of India: the Global Burden of Disease Study 1990–2017. *Lancet Child Adolesc Health* 2019; **3**: 855–70
20. Yajnik CS, Fall CHD, Koyaji K *et al*. Yajnik, C., Fall, C., Coyaji, K. *et al*. Neonatal anthropometry: the thin–fat Indian baby. The Pune Maternal Nutrition Study. *Int J Obes* **27**, 173–180 (2003). Neonatal anthropometry: the thin-fat Indian baby. The Pune Maternal Nutrition Study. *Int J Obes* 2003; **27**: 173–80.
21. Krishnaveni GV, Hill JC, Veena SR *et al*. Truncal adiposity is present at birth and in early childhood in South Indian children. *Indian Pediatrics* 2005; **42**: 537–

- 1  
2  
3 22. Barker DJP, Osmond C, Kajantie E *et al*. Growth and chronic disease: findings in the  
4 Helsinki Birth Cohort. *Ann Hum Biol* 2009; **36**: 445-58.
- 5 23. International Institute for Population Sciences (IIPS) and ICF. 2017. National Family  
6 Health Survey (NFHS-4), 2015-16: India. District Fact Sheet, Mysore, Karnataka. Mumbai:  
7 IIPS.
- 8 24. International Institute for Population Sciences (IIPS) and ICF. 2017. National Family  
9 Health Survey (NFHS-4), 2015-16: India. State Fact Sheet, Karnataka. Mumbai: IIPS.
- 10 25. Lawrence W, Black C, Tinati T *et al*. Making every contact count: evaluation of the  
11 impact of an intervention to train health and social care practitioners in skills to support  
12 health behaviour change. *J Health Psychol* 2016. **21**: 138–51.
- 13 26. Rahman A, Malik A, Sikander S *et al*. Cognitive behaviour therapy-based intervention by  
14 community health workers for mothers with depression and their infants in rural Pakistan: a  
15 cluster-randomised controlled trial. *Lancet* 2008; **72**: 902-9.
- 16 27. Rahman A, Iqbal Z, Roberts C *et al*. Cluster randomized trial of a parent-based  
17 intervention to support early development of children in a low-income country. *Child Care  
18 Health Dev* 2009; **35**: 56-62.
- 19 28. Bhutta ZA, Das JK, Rizvi A *et al*. The Lancet Nutrition Interventions Review Group, and  
20 The Maternal and Child Health Study Group. Evidence-based interventions for improvement  
21 of maternal and child nutrition: what can be done and at what cost? *Lancet* 2013;**382**:452-  
22 77.
- 23 29. Bhutta ZA, Haider BA. Maternal micronutrient supplementation for women during  
24 pregnancy. *Cochrane Database Syst Rev* 2015;**11**:CD004905.
- 25  
26  
27  
28  
29  
30  
31  
32  
33  
34  
35  
36  
37  
38  
39  
40  
41  
42  
43  
44  
45  
46  
47  
48  
49  
50  
51  
52  
53  
54  
55  
56  
57  
58  
59  
60

## **Appendix 1: HeLTI India (EINSTEIN) Group Work Principles**

**Intended beneficiaries:** Community health workers (CHWs), based at Vivekananda Memorial Hospital will facilitate a series of peer group discussion and learning sessions among all women enrolled into the intervention arms, i.e. the pre-conception and pregnancy arms (and no peer support intervention will be delivered to participants allocated to the control arm).

**Components:** The peer support “package” will consist of:

- (i) Sequential facilitation of 6 pre-conceptual, 5 pregnancy and 5 post-natal timed & targeted content modules by trained CHWs
- (ii) Training and refresher sessions for CHWs on Healthy conversation skills (HCS), Learning Through Play Plus (LTP+), and intervention modules facilitation, conducted by trainers from CSI Holdsworth Memorial Hospital
- (iii) Regular observation and supportive supervision of CHWs by Quality Control teams and field supervisors/manager.

**Materials:** Participants each receive a *personalized* pictorial resource/work booklet for the whole set of sessions.

CHW will receive resource guides, attendance and delivery log sheets, and reflection report guides.

**Logistics:** Peer support groups will be convened in groups of up to 10-12, for delivery each month. In each intervention village/cluster there may be ~30 women enrolled at the beginning, so there will be multiple peer groups per cluster. As more women are enrolled as they become eligible, the groups may increase. After enrollment and baseline data collection (including biospecimens), the initial session will be conducted by a CHW ~2-4 weeks later. Subsequent sessions will be conducted on a “timed and targeted” schedule roughly every month.

**Rationale and process of development:** The primary topics and specific content mix for each session were developed based on:

- Context of existing services, if any
- Alignment with key goals of the study
- Prioritisation of women’s health needs, identified with key stakeholder consultations
- Feedback from initial community engagements (e.g. people recognised that they won’t benefit and changes won’t be immediate, will benefit future generations, their children).

Spillover chances/potential contamination, although possible, are considered low because of the:

- Individual nature of intervention (including booklet materials being personalized)
- Peers support group discussions are private, small-scale

- 1  
2  
3 - Limited social media.  
4  
5

6 Guiding principles of the peer group sessions:  
7

- 8 - Empowering women participants  
9 - Timed and targeted to reproductive stage  
10 - Integrated with HCS approach  
11 - Topical mix packaged unconventionally, but coherently from participant perspectives  
12 - Ground-truthed, using formative research and pre-testing  
13 - Cyclicity, with short enough amplitude for re-exposure during a pregnancy  
14 - Leverages/integrates existing local, state, national assets (e.g. teaching materials,  
15 best practice guidelines) and solutions (e.g locally available foods, recipes, resources,  
16 etc)  
17 - Addressing barriers and beliefs, myths (e.g. eating down, transport fears, etc  
18 - Offer training to all health workers, eg. bioethics to ensure equity  
19  
20  
21  
22

23 Every session is structured to:  
24

- 25 - Engage participants with their own assessment of salient health needs and solutions  
26 - Provide new information about relevant indicators for the community, specific  
27 illness threats to women and children, and about healthy options and local solutions  
28 to adopt  
29 - Provide a sample commodity or referral resource, that can be sustainable through  
30 subsequent participant choices  
31 - Provide a self-reflection or self-monitoring opportunity for review in the next session  
32  
33  
34

35 Final versions of the materials and mode of delivery developed in consultation with:  
36

- 37 - PIs and co-PIs  
38 - Other team members  
39 - Selected group of CHWs  
40 - Selected group of women (potential participants).  
41  
42  
43  
44  
45  
46  
47  
48  
49  
50  
51  
52  
53  
54  
55  
56  
57  
58  
59  
60

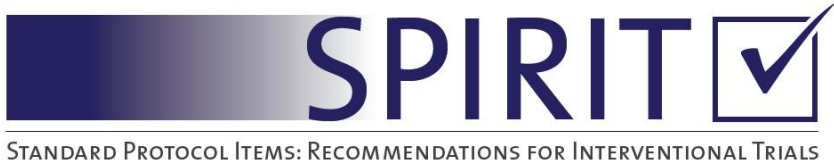

SPIRIT 2013 Checklist: Recommended items to address in a clinical trial protocol and related documents\*

| Section/item                      | Item No | Description                                                                                                                                                                                                                                                                              | Addressed on page number |
|-----------------------------------|---------|------------------------------------------------------------------------------------------------------------------------------------------------------------------------------------------------------------------------------------------------------------------------------------------|--------------------------|
| <b>Administrative information</b> |         |                                                                                                                                                                                                                                                                                          |                          |
| Title                             | 1       | Descriptive title identifying the study design, population, interventions, and, if applicable, trial acronym                                                                                                                                                                             | __1__                    |
| Trial registration                | 2a      | Trial identifier and registry name. If not yet registered, name of intended registry                                                                                                                                                                                                     | __CTRI and<br>ISRCTN__   |
|                                   | 2b      | All items from the World Health Organization Trial Registration Data Set                                                                                                                                                                                                                 | __NA__                   |
| Protocol version                  | 3       | Date and version identifier                                                                                                                                                                                                                                                              | __NA__                   |
| Funding                           | 4       | Sources and types of financial, material, and other support                                                                                                                                                                                                                              | __14__                   |
| Roles and responsibilities        | 5a      | Names, affiliations, and roles of protocol contributors                                                                                                                                                                                                                                  | __1, 14__                |
|                                   | 5b      | Name and contact information for the trial sponsor                                                                                                                                                                                                                                       | __14__                   |
|                                   | 5c      | Role of study sponsor and funders, if any, in study design; collection, management, analysis, and interpretation of data; writing of the report; and the decision to submit the report for publication, including whether they will have ultimate authority over any of these activities | __14__                   |
|                                   | 5d      | Composition, roles, and responsibilities of the coordinating centre, steering committee, endpoint adjudication committee, data management team, and other individuals or groups overseeing the trial, if applicable (see Item 21a for data monitoring committee)                         | __6, 14__                |

1 **Introduction**

2

3 Background and rationale 6a Description of research question and justification for undertaking the trial, including summary of relevant studies (published and unpublished) examining benefits and harms for each intervention \_\_\_\_\_ 5-6 \_\_\_\_\_

4

5

6 6b Explanation for choice of comparators \_\_\_\_\_ 7-8 \_\_\_\_\_

7

8 Objectives 7 Specific objectives or hypotheses \_\_\_\_\_ 6-7 \_\_\_\_\_

9

10 Trial design 8 Description of trial design including type of trial (eg, parallel group, crossover, factorial, single group), allocation ratio, and framework (eg, superiority, equivalence, noninferiority, exploratory) \_\_\_\_\_ 7 \_\_\_\_\_

11

12

13

14 **Methods: Participants, interventions, and outcomes**

15

16 Study setting 9 Description of study settings (eg, community clinic, academic hospital) and list of countries where data will be collected. Reference to where list of study sites can be obtained \_\_\_\_\_ 6-7 \_\_\_\_\_

17

18

19 Eligibility criteria 10 Inclusion and exclusion criteria for participants. If applicable, eligibility criteria for study centres and individuals who will perform the interventions (eg, surgeons, psychotherapists) \_\_\_\_\_ 6-7 \_\_\_\_\_

20

21

22 Interventions 11a Interventions for each group with sufficient detail to allow replication, including how and when they will be administered \_\_\_\_\_ 7-8 \_\_\_\_\_

23

24

25 11b Criteria for discontinuing or modifying allocated interventions for a given trial participant (eg, drug dose change in response to harms, participant request, or improving/worsening disease) \_\_\_\_\_ 7-8; 10 \_\_\_\_\_

26

27

28 11c Strategies to improve adherence to intervention protocols, and any procedures for monitoring adherence (eg, drug tablet return, laboratory tests) \_\_\_\_\_ 10-11 \_\_\_\_\_

29

30

31 11d Relevant concomitant care and interventions that are permitted or prohibited during the trial \_\_\_\_\_ 7-8 \_\_\_\_\_

32

33

34 Outcomes 12 Primary, secondary, and other outcomes, including the specific measurement variable (eg, systolic blood pressure), analysis metric (eg, change from baseline, final value, time to event), method of aggregation (eg, median, proportion), and time point for each outcome. Explanation of the clinical relevance of chosen efficacy and harm outcomes is strongly recommended \_\_\_\_\_ 8 \_\_\_\_\_

35

36

37

38

39

40 Participant timeline 13 Time schedule of enrolment, interventions (including any run-ins and washouts), assessments, and visits for participants. A schematic diagram is highly recommended (see Figure) \_\_\_\_\_ 8; 12-13 \_\_\_\_\_

41

42

43

44

45

46



|    |                                                                     |     |                                                                                                                                                                                                                                                                                                                                                                                                              |                      |
|----|---------------------------------------------------------------------|-----|--------------------------------------------------------------------------------------------------------------------------------------------------------------------------------------------------------------------------------------------------------------------------------------------------------------------------------------------------------------------------------------------------------------|----------------------|
| 1  | Sample size                                                         | 14  | Estimated number of participants needed to achieve study objectives and how it was determined, including clinical and statistical assumptions supporting any sample size calculations                                                                                                                                                                                                                        | _____ 8-9 _____      |
| 2  |                                                                     |     |                                                                                                                                                                                                                                                                                                                                                                                                              |                      |
| 3  |                                                                     |     |                                                                                                                                                                                                                                                                                                                                                                                                              |                      |
| 4  | Recruitment                                                         | 15  | Strategies for achieving adequate participant enrolment to reach target sample size                                                                                                                                                                                                                                                                                                                          | _____ 9; 10-11 _____ |
| 5  |                                                                     |     |                                                                                                                                                                                                                                                                                                                                                                                                              |                      |
| 6  |                                                                     |     |                                                                                                                                                                                                                                                                                                                                                                                                              |                      |
| 7  | <b>Methods: Assignment of interventions (for controlled trials)</b> |     |                                                                                                                                                                                                                                                                                                                                                                                                              |                      |
| 8  | Allocation:                                                         |     |                                                                                                                                                                                                                                                                                                                                                                                                              |                      |
| 9  |                                                                     |     |                                                                                                                                                                                                                                                                                                                                                                                                              |                      |
| 10 | Sequence generation                                                 | 16a | Method of generating the allocation sequence (eg, computer-generated random numbers), and list of any factors for stratification. To reduce predictability of a random sequence, details of any planned restriction (eg, blocking) should be provided in a separate document that is unavailable to those who enrol participants or assign interventions                                                     | _____ 7 _____        |
| 11 |                                                                     |     |                                                                                                                                                                                                                                                                                                                                                                                                              |                      |
| 12 |                                                                     |     |                                                                                                                                                                                                                                                                                                                                                                                                              |                      |
| 13 |                                                                     |     |                                                                                                                                                                                                                                                                                                                                                                                                              |                      |
| 14 |                                                                     |     |                                                                                                                                                                                                                                                                                                                                                                                                              |                      |
| 15 |                                                                     |     |                                                                                                                                                                                                                                                                                                                                                                                                              |                      |
| 16 | Allocation concealment mechanism                                    | 16b | Mechanism of implementing the allocation sequence (eg, central telephone; sequentially numbered, opaque, sealed envelopes), describing any steps to conceal the sequence until interventions are assigned                                                                                                                                                                                                    | _____ 7 _____        |
| 17 |                                                                     |     |                                                                                                                                                                                                                                                                                                                                                                                                              |                      |
| 18 |                                                                     |     |                                                                                                                                                                                                                                                                                                                                                                                                              |                      |
| 19 |                                                                     |     |                                                                                                                                                                                                                                                                                                                                                                                                              |                      |
| 20 | Implementation                                                      | 16c | Who will generate the allocation sequence, who will enrol participants, and who will assign participants to interventions                                                                                                                                                                                                                                                                                    | _____ 7-8 _____      |
| 21 |                                                                     |     |                                                                                                                                                                                                                                                                                                                                                                                                              |                      |
| 22 |                                                                     |     |                                                                                                                                                                                                                                                                                                                                                                                                              |                      |
| 23 |                                                                     |     |                                                                                                                                                                                                                                                                                                                                                                                                              |                      |
| 24 | Blinding (masking)                                                  | 17a | Who will be blinded after assignment to interventions (eg, trial participants, care providers, outcome assessors, data analysts), and how                                                                                                                                                                                                                                                                    | _____ 9 _____        |
| 25 |                                                                     |     |                                                                                                                                                                                                                                                                                                                                                                                                              |                      |
| 26 |                                                                     |     |                                                                                                                                                                                                                                                                                                                                                                                                              |                      |
| 27 |                                                                     | 17b | If blinded, circumstances under which unblinding is permissible, and procedure for revealing a participant's allocated intervention during the trial                                                                                                                                                                                                                                                         | _____ 9 _____        |
| 28 |                                                                     |     |                                                                                                                                                                                                                                                                                                                                                                                                              |                      |
| 29 |                                                                     |     |                                                                                                                                                                                                                                                                                                                                                                                                              |                      |
| 30 |                                                                     |     |                                                                                                                                                                                                                                                                                                                                                                                                              |                      |
| 31 | <b>Methods: Data collection, management, and analysis</b>           |     |                                                                                                                                                                                                                                                                                                                                                                                                              |                      |
| 32 |                                                                     |     |                                                                                                                                                                                                                                                                                                                                                                                                              |                      |
| 33 | Data collection methods                                             | 18a | Plans for assessment and collection of outcome, baseline, and other trial data, including any related processes to promote data quality (eg, duplicate measurements, training of assessors) and a description of study instruments (eg, questionnaires, laboratory tests) along with their reliability and validity, if known. Reference to where data collection forms can be found, if not in the protocol | _____ 8, 12-13 _____ |
| 34 |                                                                     |     |                                                                                                                                                                                                                                                                                                                                                                                                              |                      |
| 35 |                                                                     |     |                                                                                                                                                                                                                                                                                                                                                                                                              |                      |
| 36 |                                                                     |     |                                                                                                                                                                                                                                                                                                                                                                                                              |                      |
| 37 |                                                                     |     |                                                                                                                                                                                                                                                                                                                                                                                                              |                      |
| 38 |                                                                     |     |                                                                                                                                                                                                                                                                                                                                                                                                              |                      |
| 39 |                                                                     | 18b | Plans to promote participant retention and complete follow-up, including list of any outcome data to be collected for participants who discontinue or deviate from intervention protocols                                                                                                                                                                                                                    | _____ 9-10 _____     |
| 40 |                                                                     |     |                                                                                                                                                                                                                                                                                                                                                                                                              |                      |
| 41 |                                                                     |     |                                                                                                                                                                                                                                                                                                                                                                                                              |                      |
| 42 |                                                                     |     |                                                                                                                                                                                                                                                                                                                                                                                                              |                      |
| 43 |                                                                     |     |                                                                                                                                                                                                                                                                                                                                                                                                              |                      |
| 44 |                                                                     |     |                                                                                                                                                                                                                                                                                                                                                                                                              |                      |
| 45 |                                                                     |     |                                                                                                                                                                                                                                                                                                                                                                                                              |                      |
| 46 |                                                                     |     |                                                                                                                                                                                                                                                                                                                                                                                                              |                      |

|    |                                 |     |                                                                                                                                                                                                                                                                                                                                       |               |
|----|---------------------------------|-----|---------------------------------------------------------------------------------------------------------------------------------------------------------------------------------------------------------------------------------------------------------------------------------------------------------------------------------------|---------------|
| 1  | Data management                 | 19  | Plans for data entry, coding, security, and storage, including any related processes to promote data quality (eg, double data entry; range checks for data values). Reference to where details of data management procedures can be found, if not in the protocol                                                                     | ___ 9-11 ___  |
| 2  |                                 |     |                                                                                                                                                                                                                                                                                                                                       |               |
| 3  |                                 |     |                                                                                                                                                                                                                                                                                                                                       |               |
| 4  |                                 |     |                                                                                                                                                                                                                                                                                                                                       |               |
| 5  | Statistical methods             | 20a | Statistical methods for analysing primary and secondary outcomes. Reference to where other details of the statistical analysis plan can be found, if not in the protocol                                                                                                                                                              | ___ 9-10 ___  |
| 6  |                                 |     |                                                                                                                                                                                                                                                                                                                                       |               |
| 7  |                                 |     |                                                                                                                                                                                                                                                                                                                                       |               |
| 8  |                                 | 20b | Methods for any additional analyses (eg, subgroup and adjusted analyses)                                                                                                                                                                                                                                                              | ___ 9-10 ___  |
| 9  |                                 |     |                                                                                                                                                                                                                                                                                                                                       |               |
| 10 |                                 | 20c | Definition of analysis population relating to protocol non-adherence (eg, as randomised analysis), and any statistical methods to handle missing data (eg, multiple imputation)                                                                                                                                                       | ___ 9-10 ___  |
| 11 |                                 |     |                                                                                                                                                                                                                                                                                                                                       |               |
| 12 |                                 |     |                                                                                                                                                                                                                                                                                                                                       |               |
| 13 |                                 |     |                                                                                                                                                                                                                                                                                                                                       |               |
| 14 | <b>Methods: Monitoring</b>      |     |                                                                                                                                                                                                                                                                                                                                       |               |
| 15 |                                 |     |                                                                                                                                                                                                                                                                                                                                       |               |
| 16 | Data monitoring                 | 21a | Composition of data monitoring committee (DMC); summary of its role and reporting structure; statement of whether it is independent from the sponsor and competing interests; and reference to where further details about its charter can be found, if not in the protocol. Alternatively, an explanation of why a DMC is not needed | ___ 6 ___     |
| 17 |                                 |     |                                                                                                                                                                                                                                                                                                                                       |               |
| 18 |                                 |     |                                                                                                                                                                                                                                                                                                                                       |               |
| 19 |                                 |     |                                                                                                                                                                                                                                                                                                                                       |               |
| 20 |                                 |     |                                                                                                                                                                                                                                                                                                                                       |               |
| 21 |                                 |     |                                                                                                                                                                                                                                                                                                                                       |               |
| 22 |                                 | 21b | Description of any interim analyses and stopping guidelines, including who will have access to these interim results and make the final decision to terminate the trial                                                                                                                                                               | ___ 6, 9 ___  |
| 23 |                                 |     |                                                                                                                                                                                                                                                                                                                                       |               |
| 24 |                                 |     |                                                                                                                                                                                                                                                                                                                                       |               |
| 25 | Harms                           | 22  | Plans for collecting, assessing, reporting, and managing solicited and spontaneously reported adverse events and other unintended effects of trial interventions or trial conduct                                                                                                                                                     | ___ 10-11 ___ |
| 26 |                                 |     |                                                                                                                                                                                                                                                                                                                                       |               |
| 27 |                                 |     |                                                                                                                                                                                                                                                                                                                                       |               |
| 28 | Auditing                        | 23  | Frequency and procedures for auditing trial conduct, if any, and whether the process will be independent from investigators and the sponsor                                                                                                                                                                                           | ___ 6 ___     |
| 29 |                                 |     |                                                                                                                                                                                                                                                                                                                                       |               |
| 30 |                                 |     |                                                                                                                                                                                                                                                                                                                                       |               |
| 31 |                                 |     |                                                                                                                                                                                                                                                                                                                                       |               |
| 32 | <b>Ethics and dissemination</b> |     |                                                                                                                                                                                                                                                                                                                                       |               |
| 33 |                                 |     |                                                                                                                                                                                                                                                                                                                                       |               |
| 34 | Research ethics approval        | 24  | Plans for seeking research ethics committee/institutional review board (REC/IRB) approval                                                                                                                                                                                                                                             | ___ 10 ___    |
| 35 |                                 |     |                                                                                                                                                                                                                                                                                                                                       |               |
| 36 |                                 |     |                                                                                                                                                                                                                                                                                                                                       |               |
| 37 | Protocol amendments             | 25  | Plans for communicating important protocol modifications (eg, changes to eligibility criteria, outcomes, analyses) to relevant parties (eg, investigators, REC/IRBs, trial participants, trial registries, journals, regulators)                                                                                                      | ___ 10 ___    |
| 38 |                                 |     |                                                                                                                                                                                                                                                                                                                                       |               |
| 39 |                                 |     |                                                                                                                                                                                                                                                                                                                                       |               |
| 40 |                                 |     |                                                                                                                                                                                                                                                                                                                                       |               |
| 41 |                                 |     |                                                                                                                                                                                                                                                                                                                                       |               |
| 42 |                                 |     |                                                                                                                                                                                                                                                                                                                                       |               |
| 43 |                                 |     |                                                                                                                                                                                                                                                                                                                                       |               |
| 44 |                                 |     |                                                                                                                                                                                                                                                                                                                                       |               |
| 45 |                                 |     |                                                                                                                                                                                                                                                                                                                                       |               |
| 46 |                                 |     |                                                                                                                                                                                                                                                                                                                                       |               |

|    |                               |     |                                                                                                                                                                                                                                                                                     |                                                          |
|----|-------------------------------|-----|-------------------------------------------------------------------------------------------------------------------------------------------------------------------------------------------------------------------------------------------------------------------------------------|----------------------------------------------------------|
| 1  | Consent or assent             | 26a | Who will obtain informed consent or assent from potential trial participants or authorised surrogates, and how (see Item 32)                                                                                                                                                        | _____10-11_____                                          |
| 2  |                               |     |                                                                                                                                                                                                                                                                                     |                                                          |
| 3  |                               |     |                                                                                                                                                                                                                                                                                     |                                                          |
| 4  |                               | 26b | Additional consent provisions for collection and use of participant data and biological specimens in ancillary studies, if applicable                                                                                                                                               | _____10-11_____                                          |
| 5  |                               |     |                                                                                                                                                                                                                                                                                     |                                                          |
| 6  |                               |     |                                                                                                                                                                                                                                                                                     |                                                          |
| 7  | Confidentiality               | 27  | How personal information about potential and enrolled participants will be collected, shared, and maintained in order to protect confidentiality before, during, and after the trial                                                                                                | _____11_____                                             |
| 8  |                               |     |                                                                                                                                                                                                                                                                                     |                                                          |
| 9  |                               |     |                                                                                                                                                                                                                                                                                     |                                                          |
| 10 | Declaration of interests      | 28  | Financial and other competing interests for principal investigators for the overall trial and each study site                                                                                                                                                                       | _____14_____                                             |
| 11 |                               |     |                                                                                                                                                                                                                                                                                     |                                                          |
| 12 |                               |     |                                                                                                                                                                                                                                                                                     |                                                          |
| 13 | Access to data                | 29  | Statement of who will have access to the final trial dataset, and disclosure of contractual agreements that limit such access for investigators                                                                                                                                     | _____14_____                                             |
| 14 |                               |     |                                                                                                                                                                                                                                                                                     |                                                          |
| 15 |                               |     |                                                                                                                                                                                                                                                                                     |                                                          |
| 16 | Ancillary and post-trial care | 30  | Provisions, if any, for ancillary and post-trial care, and for compensation to those who suffer harm from trial participation                                                                                                                                                       | _____11_____                                             |
| 17 |                               |     |                                                                                                                                                                                                                                                                                     |                                                          |
| 18 |                               |     |                                                                                                                                                                                                                                                                                     |                                                          |
| 19 |                               |     |                                                                                                                                                                                                                                                                                     |                                                          |
| 20 | Dissemination policy          | 31a | Plans for investigators and sponsor to communicate trial results to participants, healthcare professionals, the public, and other relevant groups (eg, via publication, reporting in results databases, or other data sharing arrangements), including any publication restrictions | _____10-11_____                                          |
| 21 |                               |     |                                                                                                                                                                                                                                                                                     |                                                          |
| 22 |                               |     |                                                                                                                                                                                                                                                                                     |                                                          |
| 23 |                               |     |                                                                                                                                                                                                                                                                                     |                                                          |
| 24 |                               | 31b | Authorship eligibility guidelines and any intended use of professional writers                                                                                                                                                                                                      | _____N/A (separate publication policy within consortium) |
| 25 |                               |     |                                                                                                                                                                                                                                                                                     |                                                          |
| 26 |                               |     |                                                                                                                                                                                                                                                                                     |                                                          |
| 27 |                               |     |                                                                                                                                                                                                                                                                                     |                                                          |
| 28 |                               |     |                                                                                                                                                                                                                                                                                     |                                                          |
| 29 |                               | 31c | Plans, if any, for granting public access to the full protocol, participant-level dataset, and statistical code                                                                                                                                                                     | _____14_____                                             |
| 30 |                               |     |                                                                                                                                                                                                                                                                                     |                                                          |
| 31 | <b>Appendices</b>             |     |                                                                                                                                                                                                                                                                                     |                                                          |
| 32 |                               |     |                                                                                                                                                                                                                                                                                     |                                                          |
| 33 | Informed consent materials    | 32  | Model consent form and other related documentation given to participants and authorised surrogates                                                                                                                                                                                  | _____N/A (available on request)_____                     |
| 34 |                               |     |                                                                                                                                                                                                                                                                                     |                                                          |
| 35 |                               |     |                                                                                                                                                                                                                                                                                     |                                                          |
| 36 |                               |     |                                                                                                                                                                                                                                                                                     |                                                          |
| 37 |                               |     |                                                                                                                                                                                                                                                                                     |                                                          |
| 38 | Biological specimens          | 33  | Plans for collection, laboratory evaluation, and storage of biological specimens for genetic or molecular analysis in the current trial and for future use in ancillary studies, if applicable                                                                                      | _____N/A (available on request)_____                     |
| 39 |                               |     |                                                                                                                                                                                                                                                                                     |                                                          |
| 40 |                               |     |                                                                                                                                                                                                                                                                                     |                                                          |
| 41 |                               |     |                                                                                                                                                                                                                                                                                     |                                                          |

1 \*It is strongly recommended that this checklist be read in conjunction with the SPIRIT 2013 Explanation & Elaboration for important clarification on the items.  
2 Amendments to the protocol should be tracked and dated. The SPIRIT checklist is copyrighted by the SPIRIT Group under the Creative Commons  
3 [“Attribution-NonCommercial-NoDerivs 3.0 Unported”](#) license.  
4  
5  
6  
7  
8  
9  
10  
11  
12  
13  
14  
15  
16  
17  
18  
19  
20  
21  
22  
23  
24  
25  
26  
27  
28  
29  
30  
31  
32  
33  
34  
35  
36  
37  
38  
39  
40  
41  
42  
43  
44  
45  
46

For peer review only

# BMJ Open

**Protocol for a cluster randomised trial evaluating a multi-faceted intervention starting preconceptionally - Early Interventions to Support Trajectories for Healthy Life in India (EINSTEIN). A Healthy Life Trajectories Initiative (HeLTI) Study.**

|                               |                                                                                                                                                                                                                                                                                                                                                                                                                                                                                                                                                                                                                                                                                                                                                                                                                                                                                                                                                                                                                                                                                                                                                                                                                                                                                                                                                                                                                                                                                                                                                                                                                                                                                                                                                                                                                                                                                                                                                                                             |
|-------------------------------|---------------------------------------------------------------------------------------------------------------------------------------------------------------------------------------------------------------------------------------------------------------------------------------------------------------------------------------------------------------------------------------------------------------------------------------------------------------------------------------------------------------------------------------------------------------------------------------------------------------------------------------------------------------------------------------------------------------------------------------------------------------------------------------------------------------------------------------------------------------------------------------------------------------------------------------------------------------------------------------------------------------------------------------------------------------------------------------------------------------------------------------------------------------------------------------------------------------------------------------------------------------------------------------------------------------------------------------------------------------------------------------------------------------------------------------------------------------------------------------------------------------------------------------------------------------------------------------------------------------------------------------------------------------------------------------------------------------------------------------------------------------------------------------------------------------------------------------------------------------------------------------------------------------------------------------------------------------------------------------------|
| Journal:                      | <i>BMJ Open</i>                                                                                                                                                                                                                                                                                                                                                                                                                                                                                                                                                                                                                                                                                                                                                                                                                                                                                                                                                                                                                                                                                                                                                                                                                                                                                                                                                                                                                                                                                                                                                                                                                                                                                                                                                                                                                                                                                                                                                                             |
| Manuscript ID                 | bmjopen-2020-045862.R1                                                                                                                                                                                                                                                                                                                                                                                                                                                                                                                                                                                                                                                                                                                                                                                                                                                                                                                                                                                                                                                                                                                                                                                                                                                                                                                                                                                                                                                                                                                                                                                                                                                                                                                                                                                                                                                                                                                                                                      |
| Article Type:                 | Protocol                                                                                                                                                                                                                                                                                                                                                                                                                                                                                                                                                                                                                                                                                                                                                                                                                                                                                                                                                                                                                                                                                                                                                                                                                                                                                                                                                                                                                                                                                                                                                                                                                                                                                                                                                                                                                                                                                                                                                                                    |
| Date Submitted by the Author: | 11-Dec-2020                                                                                                                                                                                                                                                                                                                                                                                                                                                                                                                                                                                                                                                                                                                                                                                                                                                                                                                                                                                                                                                                                                                                                                                                                                                                                                                                                                                                                                                                                                                                                                                                                                                                                                                                                                                                                                                                                                                                                                                 |
| Complete List of Authors:     | <p>Kumaran, Kalyanaraman; University of Southampton, MRC Lifecourse Epidemiology Unit; CSI Holdsworth Memorial Hospital, Epidemiology Research Unit</p> <p>Krishnaveni, Ghattu ; CSI Holdsworth Memorial Hospital, Epidemiology Research Unit</p> <p>Suryanarayana, Kumar; Swami Vivekananda Memorial Hospital</p> <p>Prasad, Manohar; Swami Vivekananda Memorial Hospital</p> <p>Antonisamy, Belavendra; Christian Medical College and Hospital Vellore, Biostatistics</p> <p>Atkinson, S; McMaster University,</p> <p>Balasubramaniam, Ramaswamy; Swami Vivekananda Memorial Hospital</p> <p>Bandsma, Robert</p> <p>Bhutta, Zulfiqar; SickKids Center for Global Child Health, Centre for Global Child Health</p> <p>Chandak, Giriraj; Centre for Cellular and Molecular Biology CSIR,</p> <p>Comelli, Elena; University of Toronto Department of Nutritional Sciences</p> <p>Davidge, Sandra; University of Alberta, Edmonton, Canada, Department of Obstetrics &amp; Gynecology,</p> <p>Dennis, CindyLee; University of Toronto, Lawrence S. Bloomberg Faculty of Nursing</p> <p>Hammond, Geoffrey ; University of British Columbia, Department of Cellular &amp; Physiological Sciences</p> <p>Jha, Prabhat; CGHR, University of Toronto</p> <p>Joseph, K.; The University of British Columbia,</p> <p>Joshi, S ; Bharati Vidyapeeth Deemed University Medical College,</p> <p>Krishna, Murali; Foundation for Research and Advocacy in Mental Health (FRAMe)</p> <p>Lee , Kang ; University of Toronto, Department of Applied Psychology and Human Development,OISE</p> <p>Lye, Stephen; Lunenfeld-Tanenbaum Research Institute</p> <p>McGowan , Patrick ; University of Toronto Scarborough, Canada, Department of Biological Sciences,</p> <p>Nepomnaschy, Pablo A.; Simon Fraser University Faculty of Health Sciences</p> <p>Padvetnaya, Vivek; OP Jindal Global University Jindal School of Government and Public Policy</p> <p>Pyne, Saumyadipta ; University of Pittsburgh</p> |

|                                 |                                                                                                                                                                                                                                                                                                                                                                                                                                                                                                                                                                                                                                                                                                                                                                                                                                                                                                                                                                                                                                                                                                                                                                                                                                                                                                        |
|---------------------------------|--------------------------------------------------------------------------------------------------------------------------------------------------------------------------------------------------------------------------------------------------------------------------------------------------------------------------------------------------------------------------------------------------------------------------------------------------------------------------------------------------------------------------------------------------------------------------------------------------------------------------------------------------------------------------------------------------------------------------------------------------------------------------------------------------------------------------------------------------------------------------------------------------------------------------------------------------------------------------------------------------------------------------------------------------------------------------------------------------------------------------------------------------------------------------------------------------------------------------------------------------------------------------------------------------------|
|                                 | <p>Sachdev, Harshpal; Sitaram Bhartia Institute of Science and Research, Department of Paediatrics</p> <p>Sahariah, Sirazul ; MAMTA Health Institute for Mother and Child Singhal , Nalini ; University of Calgary, Canada, Department of Paediatrics</p> <p>Trasler , Jacquetta ; McGill University, Departments of Pediatrics, Human Genetics, and Pharmacology and Therapeutics</p> <p>Yajnik, Chittaranjan; KEM Hospital Pune, Diabetes Unit, KEMHRC</p> <p>Baird, Janis; University of Southampton, MRC Epidemiology Resource Centre</p> <p>Barker, Mary; University of Southampton, MRC Lifecourse Epidemiology Unit</p> <p>Martin , Marie-Claude ; Alliance for Human Development; Lunenfeld-Tanenbaum Research Institute, Sinai Health System, Toronto, Canada</p> <p>Husain, Nusrat; The University of Manchester, School of Medicine</p> <p>Sellen, Daniel; University of Toronto,</p> <p>Fall, Caroline ; University of Southampton, MRC Lifecourse Epidemiology Unit</p> <p>Shah, Prakesh; Mount Sinai Hospital and University of Toronto, Department of Paediatrics</p> <p>Mathews, Stephen; Lunenfeld-Tanenbaum Research Institute, Sinai Health System, Alliance for Human Development; University of Toronto, Departments of Obstetrics &amp; Gynecology, Physiology, and Medicine</p> |
| <b>Primary Subject Heading</b>: | Epidemiology                                                                                                                                                                                                                                                                                                                                                                                                                                                                                                                                                                                                                                                                                                                                                                                                                                                                                                                                                                                                                                                                                                                                                                                                                                                                                           |
| Secondary Subject Heading:      | Public health                                                                                                                                                                                                                                                                                                                                                                                                                                                                                                                                                                                                                                                                                                                                                                                                                                                                                                                                                                                                                                                                                                                                                                                                                                                                                          |
| Keywords:                       | PUBLIC HEALTH, PREVENTIVE MEDICINE, EPIDEMIOLOGY                                                                                                                                                                                                                                                                                                                                                                                                                                                                                                                                                                                                                                                                                                                                                                                                                                                                                                                                                                                                                                                                                                                                                                                                                                                       |
|                                 |                                                                                                                                                                                                                                                                                                                                                                                                                                                                                                                                                                                                                                                                                                                                                                                                                                                                                                                                                                                                                                                                                                                                                                                                                                                                                                        |

SCHOLARONE™  
Manuscripts



I, the Submitting Author has the right to grant and does grant on behalf of all authors of the Work (as defined in the below author licence), an exclusive licence and/or a non-exclusive licence for contributions from authors who are: i) UK Crown employees; ii) where BMJ has agreed a CC-BY licence shall apply, and/or iii) in accordance with the terms applicable for US Federal Government officers or employees acting as part of their official duties; on a worldwide, perpetual, irrevocable, royalty-free basis to BMJ Publishing Group Ltd ("BMJ") its licensees and where the relevant Journal is co-owned by BMJ to the co-owners of the Journal, to publish the Work in this journal and any other BMJ products and to exploit all rights, as set out in our [licence](#).

The Submitting Author accepts and understands that any supply made under these terms is made by BMJ to the Submitting Author unless you are acting as an employee on behalf of your employer or a postgraduate student of an affiliated institution which is paying any applicable article publishing charge ("APC") for Open Access articles. Where the Submitting Author wishes to make the Work available on an Open Access basis (and intends to pay the relevant APC), the terms of reuse of such Open Access shall be governed by a Creative Commons licence – details of these licences and which [Creative Commons](#) licence will apply to this Work are set out in our licence referred to above.

Other than as permitted in any relevant BMJ Author's Self Archiving Policies, I confirm this Work has not been accepted for publication elsewhere, is not being considered for publication elsewhere and does not duplicate material already published. I confirm all authors consent to publication of this Work and authorise the granting of this licence.

**Protocol for a cluster randomised trial evaluating a multi-faceted intervention starting preconceptionally - Early Interventions to Support Trajectories for Healthy Life in India (EINSTEIN). A Healthy Life Trajectories Initiative (HeLTI) Study.**

**Authors:**

Kalyanaraman Kumaran DM<sup>1,2</sup>, Ghattu V. Krishnaveni PhD<sup>2</sup>, Kumar Gavali Suryanarayana MD<sup>3,4</sup>, Manohar Prabhu Prasad MPH<sup>3,4</sup>, Antonisamy Belavendra PhD<sup>5</sup>, Stephanie Atkinson PhD<sup>6</sup>, Ramaswamy Balasubramaniam MD<sup>4</sup>, Robert H. J. Bandsma PhD<sup>7,8</sup>, Zulfiqar A. Bhutta PhD<sup>9,10</sup>, Giriraj Ratan Chandak PhD<sup>11</sup>, Elena M. Comelli PhD<sup>12,13</sup>, Sandra T. Davidge PhD<sup>14</sup>, Cindy-Lee Dennis PhD<sup>15,16</sup>, Geoffrey L. Hammond PhD<sup>17</sup>, Prabhat Jha DPhil<sup>18</sup>, K.S. Joseph MD PhD<sup>19,20</sup>, Sadhana R. Joshi PhD<sup>21</sup>, Murali Krishna PhD<sup>22</sup>, Kang Lee PhD<sup>23</sup>, Stephen Lye PhD<sup>24,25</sup>, Patrick McGowan PhD<sup>26</sup>, Pablo Nepomnaschy PhD<sup>27</sup>, Vivek Padvetnaya DPhil<sup>28</sup>, Saumyadipta Pyne PhD<sup>29,30</sup>, Harshpal Singh Sachdev MD<sup>31</sup>, Sirazul Ameen Sahariah MD<sup>32</sup>, Nalini Singhal MD<sup>33</sup>, Jacquetta Trasler PhD<sup>34,35</sup>, Chittaranjan S Yajnik MD<sup>36</sup>, Janis Baird PhD<sup>2,37</sup>, Mary Barker PhD<sup>2,37</sup>, Marie-Claude Martin PhD<sup>24</sup>, Nusrat Husain MD<sup>38</sup>, Daniel Sellen PhD<sup>39,40</sup>, Caroline H. D. Fall DM<sup>2</sup>, Prakesh S. Shah MD<sup>41,42</sup>, Stephen G. Matthews PhD<sup>24,25</sup>

**Corresponding author:** Kalyanaraman Kumaran

Postal address: Epidemiology Research Unit, CSI Holdsworth Memorial Hospital, Mandi Mohalla, Mysore 570001 India

E-mail: [kumarank@hotmail.com](mailto:kumarank@hotmail.com); [kk@mrc.soton.ac.uk](mailto:kk@mrc.soton.ac.uk)

Tel: +91-821-2521651

Fax: +91-821-2565607

**Author affiliations:**

1. Epidemiology Research Unit, CSI Holdsworth Memorial Hospital, Mysore, India
2. MRC Lifecourse Epidemiology Unit, University of Southampton, UK
3. Vivekananda Memorial Hospital, Saragur, India
4. Swami Vivekananda Youth Movement, Mysore, India
5. Department of Biostatistics, Christian Medical College, Vellore, India
6. Department of Paediatrics, McMaster University, Hamilton, Canada
7. Division of Gastroenterology, Hepatology and Nutrition, The Hospital for Sick Children, Toronto, Canada
8. Department of Paediatrics and Nutritional Sciences, University of Toronto, Canada
9. Centre for Global Child Health, The Hospital for Sick Children, Toronto, Canada
10. Department of Nutritional Sciences and Division of Epidemiology, Dalla Lana School of Public Health, University of Toronto, Canada
11. CSIR - Centre for Cellular and Molecular Biology, Hyderabad, India
12. Department of Nutritional Sciences, University of Toronto, Canada
13. Joannah and Brian Lawson Centre for Child Nutrition
14. Department of Obstetrics & Gynecology, University of Alberta, Edmonton, Canada
15. Lawrence S. Bloomberg Faculty of Nursing and Department of Psychiatry, University of Toronto, Canada
16. Li Ka Shing Knowledge Institute, St. Michael's Hospital, Toronto, Canada
17. Department of Cellular & Physiological Sciences, University of British Columbia, Vancouver, Canada
18. Epidemiology Division, Dalla Lana School of Public Health, University of Toronto, Canada
19. Department of Obstetrics & Gynecology, University of British Columbia, Vancouver, Canada



20. School of Population and Public Health, University of British Columbia, Vancouver, Canada
21. Nutritional Medicine Division, Interactive Research School for Health Affairs, Bharati Vidyapeeth, Pune, India
22. Foundation for Research and Advocacy in Mental Health (FRAMe), Mysore, India.
23. Department of Applied Psychology and Human Development, OISE/University of Toronto, Canada
24. Alliance for Human Development; Lunenfeld-Tanenbaum Research Institute, Sinai Health System, Toronto, Canada
25. Departments of Obstetrics & Gynecology, Physiology, and Medicine, University of Toronto, Canada
26. Department of Biological Sciences, University of Toronto Scarborough, Canada
27. Faculty of Health Sciences, Simon Fraser University, Burnaby, Canada
28. Jindal School of Government and Public Policy, O.P. Jindal Global University, Sonipat, India
29. Public Health Dynamics Lab and Department of Biostatistics, University of Pittsburgh, USA
30. Health Analytics Network, Pennsylvania, USA
31. Department of Pediatrics and Clinical Epidemiology, Sitaram Bhartia Institute of Science and Research, New Delhi, India
32. Mamta Health Institute for Mother and Child, New Delhi, India
33. Department of Paediatrics, University of Calgary, Canada
34. Departments of Pediatrics, Human Genetics, and Pharmacology and Therapeutics, McGill University, Montreal, Canada
35. Research Institute of the McGill University Health Centre, Montreal, Canada
36. Diabetes Unit, King Edward Memorial Hospital and Research Centre, Pune, India
37. NIHR Southampton Biomedical Research Centre, UK
38. Division of Psychology and Mental Health, University of Manchester, UK
39. Joannah and Brian Lawson Centre for Child Nutrition, Department of Nutritional Sciences, University of Toronto, Canada
40. Department of Anthropology, Dalla Lana School of Public Health, University of Toronto, Canada
41. Department of Paediatrics, Mount Sinai Hospital, Toronto, Canada
42. Department of Paediatrics and Institute of Health Policy Management and Evaluation, University of Toronto, Canada

**Key words:** Developmental origins of health and disease (DOHaD), Multi-faceted intervention; Pre-conceptional intervention; Non-communicable diseases; India

**Word count:** 4223

## ABSTRACT

**Introduction:** The Healthy Life Trajectories Initiative (HeLTI) is an international consortium comprising four harmonised but independently powered trials to evaluate whether an integrated intervention starting pre-conceptionally will reduce non-communicable disease risk in their children. This paper describes the protocol of the India study.

**Methods and analysis:** The study set in rural Mysore will recruit ~6000 married women over the age of 18 years. The village-based cluster randomised design has three arms (pre-conception, pregnancy and control; 35 villages per arm). The longitudinal multi-faceted intervention package will be delivered by community health workers and comprise: a) measures to optimise nutrition; b) a group parenting programme integrated with cognitive behavior therapy; c) a lifestyle behavior change intervention to support women to achieve a diverse diet, exclusive breastfeeding for the first 6 months, timely introduction of diverse and nutritious infant weaning foods, and adopt appropriate hygiene measures; and d) the reduction of environmental pollution focusing on indoor air pollution and toxin avoidance.

The primary outcome is adiposity in children at age 5 years, measured by fat mass index. We will report on a host of intermediate and process outcomes. We will collect a range of biospecimens including blood, urine, stool, and saliva from the mothers, as well as umbilical cord blood, placenta and specimens from the offspring.

An intention-to-treat analysis will be adopted to assess the effect of interventions on outcomes. We will also undertake process and economic evaluations to determine scalability and public health translation.

**Ethics and dissemination:** The study has been approved by the institutional ethics committee of the lead institute. Findings will be published in peer-reviewed journals. We will interact with policy makers at local, national and international agencies to enable translation. We will also share the findings with the participants and local community through community meetings, newsletters and local radio.

**Trial registration:** ISRCTN20161479

**Keywords:** Non-communicable disease; Developmental Origins of Health and Disease; Pre-conceptional intervention; Childhood adiposity; Child development, Healthy Life Trajectory Initiative (HeLTI)

## STRENGTHS AND LIMITATIONS OF THIS STUDY

- The study will evaluate, for the first time in India, whether a multi-faceted intervention starting pre-conceptionally and continuing through pregnancy, infancy and early childhood reduces risk factors for non-communicable disease in the offspring.
- The study builds upon 35 years of local work which has resulted in strong community engagement and rapport.
- The process and economic evaluations will help in scalability while the use of local community workers will aid translation.
- Given the long-term nature of the study, unblinding of selected outcomes will occur at the end of each phase to enable interim mechanistic analyses and thereby maximise the study potential.
- Due to the study design, effectiveness of individual components of the intervention cannot be evaluated.

## INTRODUCTION

Non-communicable diseases (NCDs) are major causes of death and disability globally<sup>1,2</sup> and are rising rapidly in low- and middle-income countries (LMICs)<sup>1-3</sup>. The rising burden of cardiometabolic disease in LMICs is accompanied by a growing recognition of the burden of mental health disorders. Depression is the leading neuropsychiatric cause of disease burden globally and in LMICs<sup>4</sup>, and is projected to be the second leading cause of disease burden by 2020<sup>5</sup>.

In India, an estimated 65 million people have diabetes and a further 77 million are pre-diabetic<sup>6,7</sup>. Unchecked, the population with diabetes is expected to reach 109 million by 2035<sup>6</sup>. A review showed that 13% of young people aged 1-16 years in India experience mental health disorders<sup>8</sup>. In later life, ~3.7 million people over 60 years of age have dementia; this number is expected to double by 2030 and triple by 2050<sup>9</sup>. These diseases have significant economic implications; the treatment and related costs amount to INR 19914 (US\$398) and INR 43285 (\$865) per person per year for diabetes<sup>10</sup> and dementia<sup>11</sup>, respectively.

The developmental origins of health and disease (DOHaD) hypothesis suggests that adversity during early life influences adult NCD risk<sup>12,13</sup>. DOHaD research suggests that NCD risk is influenced not only by exposure to the well-known 'load' factors such as adult obesity and physical inactivity, but also by the 'capacity' of key metabolic tissues, which is acquired during early development<sup>14</sup>. It is now well established that low birth weight (LBW), poor infant nutrition, and rapid childhood weight gain and obesity are risk factors for poor health trajectories and development of NCDs in later life<sup>15,16</sup>.

Undernutrition (including widespread micronutrient deficiencies) remains a significant problem in India. In children under 5, the prevalence of stunting is ~35%; wasting ~17%; underweight ~33%, and anaemia ~41%<sup>17</sup>. In women aged 15-49 years, 23% are underweight (body mass index, BMI<18.5 kg/m<sup>2</sup>) while ~53% are anaemic<sup>18</sup>. These factors are reflected in a high prevalence of LBW (<2500g) in ~21% of the 26 million babies born in India each year<sup>19</sup>. Rates of obesity are also increasing; it is estimated that ~12% of children and ~21% of women of reproductive age are overweight or obese (adult BMI>25 kg/m<sup>2</sup>)<sup>18</sup>.

Application of DOHaD principles offers a novel approach to tackling NCDs by delivering interventions in an integrated manner across the lifecourse: in adolescent or young women to ensure they approach pregnancy in optimum health; in pregnant women to ensure a healthy pregnancy and safe delivery; and in infancy and childhood to prevent excessive childhood adiposity and promote child development.

### The Healthy Life Trajectories Initiative

In this context, the Healthy Life Trajectories Initiative (HeLTI) was launched as a joint initiative between the Canadian Institute of Health Research, the Department of Biotechnology of India, the South African Medical Research Council, the National Science Foundation of China and the World Health Organisation. This programme follows a DOHaD approach, focusing on reducing the long-term risk of NCDs through interventions that target the interaction between environmental factors and genes during pre-conception, conception, fetal life, infancy and early childhood. The HeLTI programme comprises four separate but harmonised randomised controlled trials in India, China, South Africa and Canada. The HeLTI interventions are multi-faceted; the rationale is that previous single intervention trials (e.g. multiple micronutrient supplementation) have shown only modest benefits for pregnancy and child outcomes and that multiple interventions are needed to create impact in populations with multiple environmental and social disadvantages. Previous trials have usually started after confirmation of pregnancy and have therefore missed the important peri-

1  
2  
3 conceptional and early pregnancy processes of epigenetic change, placentation and  
4 organogenesis; starting pre-conceptionally will address these issues.  
5

6 The HeLTI consortium has a collective governance structure for the management of the  
7 trials. The two co-lead PIs of each of the four HeLTI trials form an over-arching Research  
8 Committee (RC), with rotating chairpersons, responsible for overall project management and  
9 oversight, liaising with working groups and reporting to the HeLTI Council (comprising  
10 representatives from all the funders and a WHO secretariat). Working groups, including  
11 investigators from all countries chaired by one of the lead PIs, develop harmonised  
12 protocols, covering biospecimens, data collection, interventions, cohort management and  
13 retention, and data management. Each country project team has a Steering Committee,  
14 comprising the two PIs and selected co-PIs, which deals with day to day operations and  
15 reports to the RC, as well as liaising with participating institutions and community  
16 representatives. The four HeLTI trials have a common Data Monitoring and Safety  
17 Committee comprising independent international experts, with representation from the four  
18 countries involved. The WHO will monitor the trial conduct.  
19  
20

### 21 **The India Study**

22 We report the protocol for the Indian study, Early Interventions to Support Trajectories for  
23 Healthy Life in India (EINSTEIN) in this paper. Research by our group has shown that part of  
24 the increased NCD risk in Indians comes from changes in fetal body composition. The  
25 undernourished Indian newborn is typically light and thin (average birth weight 2.7kg) and  
26 has a low lean body mass, but is disproportionately adipose (the 'thin-fat' Indian)<sup>20,21</sup>. This  
27 phenotype persists through childhood and into adult life, and is associated with diabetes and  
28 CVD at relatively low levels of obesity. The effects of early life undernutrition are  
29 exacerbated by poor weight gain in infancy and rapid childhood weight gain even in the  
30 absence of obesity<sup>22</sup>.  
31

32 We have specifically chosen a rural population where obesity is currently uncommon, but  
33 undernutrition is common. This population is representative of a large section of the Indian  
34 population where economic transition has started and is likely to benefit most from  
35 interventions to improve early development (capacity) as well as those that reduce the post-  
36 natal obesogenic effects of transition (load).  
37  
38

### 39 **METHODS AND ANALYSIS**

40 Our overarching aim is to investigate whether an integrated intervention starting pre-  
41 conceptionally and continuing at appropriate points across the lifecourse (pregnancy, infancy  
42 and childhood) will reduce childhood adiposity and the risk for NCDs as well as improve  
43 measures of child neurodevelopment.  
44

### 45 **Patient and public involvement**

46 Community participation is key to the success of our programme and we have engaged with the  
47 local community including community leaders, village women, village elders and local groups,  
48 particularly women's self-help groups. We held engagement meetings at village level to explain the  
49 study and clarify any queries people may have. We undertook extensive formative work over a  
50 period of ~18 months which included face-to-face meetings and focus group discussions. This  
51 work helped to finalise our intervention package and delivery methods, and dissemination plans.  
52  
53

### 54 **Subjects**

55 Our proposed study will be set in rural Mysore, in HD Kote and Saragur Taluks about 50 km  
56 from Mysore city in southern India. The population is characterised by subsistence farming,  
57 poor nutritional status, low levels of literacy particularly among women, and limited access to  
58 specialist health services. Approximately 25% of women are underweight, 19% are  
59 overweight, and 45% are anaemic<sup>23</sup>. Less than 60% of infants are exclusively breast fed for  
60 6 months<sup>24</sup>. Over 60% of children under five are anaemic and less than two-thirds are fully

1  
2  
3 immunised<sup>23,24</sup>. The prevalence of both stunting and underweight in children under five is  
4 ~38%<sup>24</sup>. Sanitation and hygiene facilities are limited and toilets are mostly shared. The local  
5 area receives potable water from taps, most commonly from shared taps situated in streets.  
6 Borewells are also a common source of water. The population is relatively stable, minimizing  
7 loss to follow up. Signs of transition are evident; village shops sell high-energy, high-salt,  
8 high-sugar snacks and drinks which are mainly consumed by children and young people.  
9 Better transport links have increased access to nearby towns and cities, allowing people to  
10 seek employment in small/cottage industries.  
11

12  
13 We have selected 105 villages based on population size (from ~250 in the area) around our main  
14 field site, Vivekananda Memorial Hospital (VMH) in Saragur, and will allocate 35 villages to each  
15 group, using a standard computerised randomisation programme. We will include women who are  
16 over the age of 18, married, have no children or one child, and are planning to have a child within  
17 the next two years. We will particularly focus on newly married women, who have a high likelihood  
18 of pregnancy within a year.  
19

### 20 **Study design**

21 The study is a community-based, cluster-randomised intervention with three arms (preconception,  
22 pregnancy and control), with individual villages forming the basis for the cluster. Women in all  
23 three arms will be recruited together, pre-conceptionally for baseline measurements. The  
24 longitudinal multi-faceted intervention will be delivered by trained community health workers  
25 (CHWs), which will allow future scalability.  
26

27 All participants will receive iron and folic acid tablets during pregnancy as per Indian guidelines.  
28 Calcium is routinely prescribed in pregnancy by many obstetricians. We will not interfere with  
29 routine care provided by the women's obstetricians. We will liaise with local doctors to ensure that  
30 they are aware of the study and the supplements their patients are taking, so that the women do  
31 not receive 'excess' micronutrients. All women will also receive menstrual hygiene advice and will  
32 be provided with a supply of menstrual pads to promote appropriate hygiene practices.  
33  
34

### 35 **Intervention details**

#### 36 Group 1 (Preconception arm):

37 *Micronutrient supplementation:* Women will receive daily micronutrient supplement tablets from  
38 recruitment preconceptionally, throughout pregnancy and during breast feeding. Given the high  
39 likelihood of multiple deficiencies, the composition will be based on the WHO/UNICEF/UNU  
40 international multiple micronutrient preparation (UNIMMAP).  
41

42 *Lifestyle behavior change support:* Women will receive support from CHWs trained in Healthy  
43 Conversation Skills (HCS), in group settings. The details of the group work are in Appendix 1. HCS  
44 is a communication technique developed at the University of Southampton by our wider team for  
45 use by health workers to support behaviour change in socio-economically disadvantaged  
46 women<sup>25</sup>. This technique has been translated to LMIC settings; in a recent feasibility study  
47 involving our group in South Africa, community health workers have been successfully trained in  
48 HCS to support young women to improve their diets and lifestyles. The group work emphasises  
49 the role of increasing self-efficacy in promoting behaviour change. It is based on the understanding  
50 that providing participants with knowledge alone is not sufficient to change their behaviour unless  
51 they are also motivated and empowered to change. The aim will be to promote a diverse diet,  
52 achieve a normal body weight, and achieve an adequate intake of micronutrients before and  
53 during pregnancy, and while breastfeeding. CHWs will provide support postnatally to encourage  
54 exclusive breast feeding for the first 6 months and the timely introduction of diverse and nutritious  
55 infant weaning foods. Women will be educated about the importance of using safe water for  
56 feeding their infants after six months, and advised to use boiled and cooled water. They will  
57 receive support to ensure that their infants are fully vaccinated, and that they adopt appropriate  
58 hygiene measures, particularly hand washing after using the toilet, changing 'nappies', and before  
59 preparing food, eating and feeding their infants. During the pre-conception stage, the group work  
60

will be held at approximately monthly intervals. There will be six modules, with the first module serving as an introductory and general health module. This will be delivered first to all women in the arm. The other five modules will be delivered cyclically and address diet, physical activity and sleep, environmental exposure and hygiene, mental health, and preparing for pregnancy.

*Group parenting and cognitive behaviour intervention (Learning Through Play Plus {LTP Plus}):* LTP Plus is a group parenting programme, integrated with a cognitive behaviour therapy intervention (Thinking Healthy Programme) designed to address perinatal depression and improve child development in LMIC settings<sup>26,27</sup>. It is a manual assisted, low-literacy, potentially sustainable programme whose activities enhance children's development. It simultaneously promotes attachment security through building parents' ability to be sensitive to their children's cues, and be actively involved in their children's development. These sessions will be delivered in phases which will not only match the woman's pace, but also the gestational period antenatally and the infant's developmental stages postnatally. This two-pronged psychosocial participatory group intervention will help mothers to cope with stress, reduce depression and provide information and strategies that they need to nurture their children's health and development. This will consist of a total of ten sessions, three during pregnancy and seven postnatally. LTP Plus uses a standardized manual and the material will be delivered by CHWs.

*Avoiding environmental pollution:* We will provide advice and information on avoidance of environmental pollutants particularly indoor smoke (cooking and smoking). We will facilitate LPG (liquefied petroleum gas) connections actively through a recently introduced government scheme which provides subsidized stoves and fuel. We will also address exposure to, and safe handling of pesticides.

#### Group 2 (Pregnancy arm):

Women in this group will receive the same package of interventions described above, but starting only after they become pregnant, which, in practice, will mean late in the first trimester. Last menstrual period dates will be monitored monthly and women will be offered a urine pregnancy test when they report missing two consecutive periods.

#### Group 3 (Control arm):

Women in this group will receive an enhanced standard of care. In addition to encouraging vaccinations (two doses of tetanus toxoid) during pregnancy, provision of 100 tablets of iron and folate, and promoting institutional delivery, they will have a similar number of contact sessions with CHWs untrained in our behaviour change and parenting interventions. They will receive standard advice on healthy lifestyle during pregnancy and postnatally, supported by information leaflets (mainly pictorial and using simple language); these will include advice on breastfeeding, immunizations, and infant weaning foods.

### **Outcomes and assessments**

The primary outcome at age 5 years in the children (across all HeLTI cohorts) is adiposity as measured by fat mass index (fat mass/height<sup>2</sup>), using DXA (dual x-ray absorptiometry). Other key outcomes at 5-6 years in the children include:

- Overweight and obesity (OWO) as assessed by BMI and indicators of body composition and distribution (waist circumference, skinfold thickness)
- Glucose metabolism as measured by fasting venous plasma glucose concentration
- Resting systolic blood pressure
- Child development as assessed using modified Kaufman battery, validated for Indian settings.

Baseline data on all participants as well as data throughout the study at intervals will be collected (Table 1). Additional phenotypic data will be collected in a subset (ranging between 50-200

individuals per arm, depending on the assessment).

### Sample size and power

All the HeLTI studies have calculated their sample size using a minimum power of 80% at 5% significance level to detect a 0.25 standard deviation (SD) difference in offspring fat mass index at 5 years of age between intervention and control groups. We intend to recruit ~6000 initially at baseline. We anticipate 50% will become pregnant within two years (based on data from our formative work). Allowing a 5% pregnancy loss and 20% drop out/loss to follow-up rate, we will have ~750 children in each arm available for follow up to assess our primary outcome (~22 per village). Assuming an intra-cluster correlation of 0.03, this gives ~95% power to detect a 0.25 SD difference in fat mass between the intervention and control groups and ~80% power to detect sex differences. If pregnancy rates are lower than expected, we will undertake a second round of recruitment at the end of the first year.

### Data analysis

As the main outcomes for the study are fat mass index, OWO rate, resting blood pressure, fasting glucose and neurodevelopmental outcomes at age 5 years, and as most children will achieve these ages only in cycle 2 (5-10 years of project), analyses at the end of cycle 1 (0-5 years of project) will explore the effects of the intervention on child anthropometric measures (at birth and serially) and neurodevelopmental outcomes. We will also assess effects on maternal anthropometry, mental health, behavioural risk factors for adiposity/obesity and glycemia. Process indicators including recruitment, retention, and indicators of programme delivery in the intervention group/s will also be determined.

An intention-to-treat analysis will be used for the key outcomes, based on all viable pregnancies. Analysts will be blinded to the study groups. Unblinding will occur after analysis or on the advice of the independent Data Monitoring Committee. We will use mixed models with a cluster-specific approach and robust error estimators adjusted for prespecified potential risk factors related to individual clusters and subjects (such as, locality and level of care, maternal age, parity, pregnancy complications, smoking, and socioeconomic status). First, standard data screening/cleaning procedures will be conducted including the extent and pattern of missing data. We will assess the comparability at randomization of the treatment groups using descriptive analyses. The distribution of modifiable risk factors for childhood obesity, poor cardiometabolic and neurodevelopmental outcomes at baseline, and their changes over time will be assessed according to study group. For women in the intervention groups, we will evaluate the number of scheduled intervention visits, and compliance with micronutrient supplements and attendance at group sessions.

At the end of the 1st cycle of the project, we expect the youngest children to be 1 year of age. We will evaluate the impact of the intervention on all indicators of potential risk factors including weight-for-length at 1 year, birthweight and proportions of SGA/LGA, head and abdominal circumferences at birth and 1 year of age, as well as on indicators of perinatal morbidity/mortality. We will also assess the impact of the intervention on maternal gestational weight gain, the proportion meeting international gestational weight gain guidelines, breastfeeding status as well as on maternal diet and physical activity in the preconception and pregnancy periods.

At 5 years of age in the children, we will assess the effect of the intervention on fat mass index (the primary outcome). Other anthropometric outcomes to be assessed at this time include OWO, BMI and centiles and adiposity (skinfold thickness, arm circumference). We will also assess the effect of the intervention on glucose metabolism, blood pressure and neurodevelopmental outcomes.

Mixed models with random intercept/slope effects and fixed effects (for the intervention) will be used to estimate the intervention effect. Due to possible heterogeneity of effects for key



1  
2  
3 outcomes according to the time of initiation of the intervention (e.g. preconception versus  
4 pregnancy) we will conduct a subgroup analysis stratifying by this variable, testing for  
5 heterogeneity. For a 'per-protocol' analysis, we will categorize clusters as high or low  
6 according to the compliance with implementation of the intervention. Sensitivity analyses will  
7 be performed to assess the influence of losses to follow-up. We will use data on all  
8 participants (i.e. with viable pregnancies at inclusion) through multiple imputation.  
9

10 *Economic evaluation:* We will undertake cost-effectiveness analysis, from a healthcare payer  
11 perspective. We will collect data related to healthcare resource use during the study,  
12 including costs of the intervention, CHWs' time, and healthcare use during pregnancy,  
13 delivery and infant/child care. Unit costs will be estimated using the activity-based costing  
14 method. Our measure of effectiveness will be based on our primary outcome; we will  
15 estimate the relative cost-effectiveness of the pre-conception strategy, pregnancy strategy  
16 and standard care; an incremental analysis will be conducted comparing the three  
17 strategies.  
18

19  
20 *Process evaluation:* Evaluation will focus on implementation, mechanisms of impact, and  
21 context. Assessment of implementation will focus on determining what is delivered and how  
22 delivery is achieved. We will measure fidelity of intervention delivery by observing CHWs in  
23 their contacts with intervention group participants, focusing on their use of HCS and LTP  
24 Plus and the competencies they demonstrate. We will also observe the contact between  
25 CHWs and control participants to record the nature of interactions. We will monitor  
26 intervention dose by recording the frequency and duration of contact between participants  
27 and CHWs. To understand the mechanisms through which the intervention brings about  
28 change in our specified outcomes, we will assess the acceptability of the intervention, and  
29 women's experiences of contact with CHWs using interviews and focus groups. In assessing  
30 context, we will aim to identify any factor that might act as a barrier or facilitator to  
31 intervention implementation or effects. This will include local and national policy, local  
32 service configuration and provision, socio-demographic and environmental factors within the  
33 villages taking part in the trial, and consultation with key stakeholders. We will also survey  
34 non-respondents and those who drop out to gain an understanding of why they did not  
35 consent to take part in the study or dropped out during the course of the trial.  
36  
37

### 38 **Expected outcomes:**

39 The study will provide robust evidence whether an integrated multi-faceted intervention  
40 starting pre-conceptionally and continuing through pregnancy and postnatally reduces risk  
41 factors for NCD in the offspring. The use of culturally-appropriate interventions will allow  
42 scalability if successful. The process and economic evaluations will aid in assessment of  
43 translation potential. We will also be able to assess the relative costs and benefits of starting  
44 interventions pre-conceptionally versus starting in pregnancy. The study will generate  
45 extensive data and build a biorepository which can be used by other researchers within India  
46 and elsewhere.  
47

## 48 **ETHICS AND DISSEMINATION**

### 49 **Ethics approval**

50  
51 The study has been approved by the CSI Holdsworth Memorial Hospital Ethics Committee,  
52 (Ref CSIHMH/ERU2019/1). Any protocol modifications will be reported to the committee and  
53 approval will be sought for any significant amendments. Informed consent will be obtained  
54 from all participants. The families will be given verbal information initially followed by written  
55 information in Kannada (local language). The participants will be encouraged to ask  
56 questions before obtaining written consent. It will be made clear that they are free to  
57 withdraw at any time from the study.  
58  
59  
60

### **Anonymity and/or confidentiality**

Every precaution will be taken to respect the privacy of the women and the confidentiality of their information. We follow research governance practice in accordance with Indian and international guidelines. All data are coded and anonymised before analysis. Strict confidentiality is maintained throughout; hard copy data are stored in locked filing cabinets and in locked rooms, with limited access. Digital data are stored on password-protected encrypted computers, with access only by authorised members of the research team. Biological samples are stored in locked freezers in a secure facility.

### **Potential risks/harm to participants in the study**

None of the interventions or investigations present risks to the participants. Micronutrient supplements have been previously used in community trials and are recommended in the Lancet series on Maternal and Child Nutrition<sup>28</sup> and in the 2015 Cochrane Review on micronutrient supplementation in pregnancy<sup>29</sup>. While we do not expect any adverse effects due to the supplements, the participants will be monitored for adverse events. The LTP Plus programme has been used previously in various LMIC settings and has been shown to reduce maternal depression; there have been no reported adverse outcomes. HCS have also been used previously in community settings without any adverse outcomes. Serious adverse events will be investigated by a medical doctor and reported to the PI and local Co-PIs. Reports will also be submitted to the local institutional ethics committee and the sponsor. Data on adverse events will also be submitted to the independent Data Monitoring Committee. All tests are done under medical supervision and appropriate referral arrangements are in place for issues requiring medical attention.

### **Dissemination**

Participants will receive reports of the relevant physical and biological measurements. If there are any abnormal results, participants will be referred to appropriate medical specialists in VMH for further management and advice.

To maximise the scientific impact, we will engage with the scientific community by presenting our work at major national and international conferences, and by publishing in high-quality peer-reviewed journals, ensuring open access. We will engage with other research groups working on maternal and child health, and develop collaborative opportunities even beyond the duration of the project. Our data will be available to the scientific community after we publish our main findings.

We also will interact with policy makers at local, national and international health agencies, and governments to enable translation of our findings into policy. Members of our collaborative group are linked into national and international policy advisory groups including local, state and national governmental committees in India and Canada, the WHO and Unicef, and we will ensure relevant findings are disseminated through these groups to influence policy. We have met with local health and government officials in the district councils to discuss the public health importance of our study. Their support will be invaluable in future translation. Research findings will be translated into project summaries and policy briefs that capture the major findings and suggest practical policy changes, based on the evidence provided by the project. Recommendations to policy makers will also focus on cost-effectiveness. These documents will be published in English as well as local languages.

The results have implications for all mothers and children, and we will engage with our communities, the wider public, and the mass media. VMH runs a radio station and we will use broadcasts to engage with the local community and provide information and updates. VMH is also actively engaged with local women's self-help groups; we will interact with them throughout the project to not only provide updates of the project, but also to incorporate their feedback into the conduct of the study. We will explain the relevance of our research to our participants and feedback important results to them through six-monthly newsletters and

1  
2  
3 also by community meetings on an annual basis. We will also publicise the study on our  
4 institutional websites and use mass media to ensure that our research findings reach a wide  
5 public audience.  
6

7  
8 In summary, our study will determine whether a longitudinal integrated intervention starting  
9 pre-conceptionally improves cardiometabolic and neurodevelopmental outcomes in the next  
10 generation. The results will have significant public health implications which can be  
11 generalised to other similar settings. The range of biospecimens being collected will allow us  
12 to understand causal mechanisms.  
13  
14  
15  
16  
17  
18  
19  
20  
21  
22  
23  
24  
25  
26  
27  
28  
29  
30  
31  
32  
33  
34  
35  
36  
37  
38  
39  
40  
41  
42  
43  
44  
45  
46  
47  
48  
49  
50  
51  
52  
53  
54  
55  
56  
57  
58  
59  
60

For peer review only

**Table 1: List of assessments to be carried out at various time points**

| <b>Mothers</b>  | <b>Baseline</b>                                                                                                                                                                                                                                                                                                                                                                                                                                                                                                                              |
|-----------------|----------------------------------------------------------------------------------------------------------------------------------------------------------------------------------------------------------------------------------------------------------------------------------------------------------------------------------------------------------------------------------------------------------------------------------------------------------------------------------------------------------------------------------------------|
| Physical health | Anthropometry: weight, height; Body composition: Bioimpedance, skinfolds (subset), DXA (subset), stable isotope (subset);<br>Blood pressure: Digital sphygmomanometer                                                                                                                                                                                                                                                                                                                                                                        |
| Biospecimen     | Blood sample: Plasma, serum, DNA, RNA (subset)                                                                                                                                                                                                                                                                                                                                                                                                                                                                                               |
| Questionnaires  | Diet: Food frequency questionnaire (FFQ), 24-hour food recall, diet diversity and food security questionnaires; Physical activity: Global Physical Activity Questionnaire (GPAQ); Sleep: Pittsburgh Sleep Quality Index (PSQI); General Self Efficacy Scale (GSES); Generalised Anxiety Disorder-7 (GAD-7); Patient Health Questionnaire -9 (PHQ-9); Adverse Childhood Experience (ACE) questionnaire<br>Sociodemography; Socioeconomic status (Standard of Living Index; SLI); Medical/ treatment/drug history; Smoking and alcohol history |
|                 | <b>Pregnancy</b>                                                                                                                                                                                                                                                                                                                                                                                                                                                                                                                             |
| Physical health | Anthropometry: weight; Body composition: Bioimpedance, stable isotope (subset); Blood pressure: Digital sphygmomanometer                                                                                                                                                                                                                                                                                                                                                                                                                     |
| Biospecimen     | Blood: Oral glucose tolerance test (OGTT), plasma, serum, DNA, RNA (subset);<br>Urine; Saliva (subset)                                                                                                                                                                                                                                                                                                                                                                                                                                       |
| Questionnaires  | FFQ, 24-hour food recall, diet diversity and food security; GPAQ; PSQI; GSES; GAD-7; Edinburgh Postnatal Depression Scale (EPDS); Social Provision Scale; Breast-feeding Self-efficacy Scale; Perceived Stress Scale<br>Sociodemography; Socioeconomic status (SLI); Medical/ treatment/drug history; Smoking and alcohol history                                                                                                                                                                                                            |
|                 | Delivery                                                                                                                                                                                                                                                                                                                                                                                                                                                                                                                                     |
|                 | Weight; Stool/rectal swab (subset); Delivery details                                                                                                                                                                                                                                                                                                                                                                                                                                                                                         |
|                 | Serial postnatal follow-up (up to 60 months)                                                                                                                                                                                                                                                                                                                                                                                                                                                                                                 |
| Physical health | Anthropometry: Weight; Body composition: DXA (subset), stable isotope (subset); Blood pressure: Digital sphygmomanometer; OGTT; blood samples                                                                                                                                                                                                                                                                                                                                                                                                |
| Biospecimen     | Blood: plasma, serum, DNA, RNA (subset), OGTT                                                                                                                                                                                                                                                                                                                                                                                                                                                                                                |
| Questionnaires  | FFQ; 24-hour food recall, diet diversity and food security; GPAQ; PSQI; GSES; GAD-7; EPDS; PHQ-9; Social Provision Scale; Breast-feeding Self efficacy Scale; Perceived Stress Scale; Parenting Stress Index;<br>Sociodemography; Socioeconomic status (SLI); Medical/ treatment/drug history; Smoking and alcohol history                                                                                                                                                                                                                   |
| <b>Fathers</b>  | <b>Index pregnancy</b>                                                                                                                                                                                                                                                                                                                                                                                                                                                                                                                       |
|                 | Anthropometry: Weight, height; Body composition: Bioimpedance, DXA (subset); Blood pressure: Digital sphygmomanometer<br>Blood: Plasma, serum, DNA, RNA (subset), saliva (subset)<br>FFQ; 24-hour food recall, diet diversity and food security; GPAQ; PSQI; PHQ-9<br>Sociodemography, Socioeconomic status (SLI); Medical/ treatment/drug history; Smoking and alcohol history                                                                                                                                                              |
| <b>Child</b>    | <b>Birth</b>                                                                                                                                                                                                                                                                                                                                                                                                                                                                                                                                 |
|                 | Anthropometry: Weight, length, head/arm/abdomen/chest circumference, skinfolds<br>DXA,<br>Cord blood; Placenta; Umbilical cord; Meconium                                                                                                                                                                                                                                                                                                                                                                                                     |
|                 | <b>Birth to 12 months</b>                                                                                                                                                                                                                                                                                                                                                                                                                                                                                                                    |
|                 | Anthropometry: Weight, length, circumferences; Body composition: DXA, stable isotope (subset)<br>Feeding history; Vaccination history; Medical/treatment/drug history<br>Stool                                                                                                                                                                                                                                                                                                                                                               |
|                 | <b>Serial postnatal follow-up (major follow-up at 24 and 60 months)</b>                                                                                                                                                                                                                                                                                                                                                                                                                                                                      |

1  
2  
3  
4  
5  
6  
7  
8  
9  
10  
11  
12  
13  
14  
15  
16  
17  
18  
19  
20  
21  
22  
23  
24  
25  
26  
27  
28  
29  
30  
31  
32  
33  
34  
35  
36  
37  
38  
39  
40  
41  
42  
43  
44  
45  
46  
47  
48  
49  
50  
51  
52  
53  
54  
55  
56  
57  
58  
59  
60

|  |                                                                                                                                                                                                                                                                                                                                                                                                                                                                                                                                                                                                                                                                                               |
|--|-----------------------------------------------------------------------------------------------------------------------------------------------------------------------------------------------------------------------------------------------------------------------------------------------------------------------------------------------------------------------------------------------------------------------------------------------------------------------------------------------------------------------------------------------------------------------------------------------------------------------------------------------------------------------------------------------|
|  | <p>Anthropometry: Weight, length/height, circumferences; Body composition: DXA, Blood pressure; Blood samples (heel prick at 24 months and venous sample at 60 months): Plasma, serum, DNA, RNA, glycaemia<br/>                 Feeding history; Sleep Questionnaire; Ages and stages questionnaire; Neuro-cognitive developmental tools: Developmental Assessment <i>Scale</i> for Indian Infants (DASII) at 24 months; modified Kaufmann Battery at 60 months; Executive function assessment tools; Physical activity (questionnaire and accelerometry); Screen time questionnaire;<br/>                 General health assessment; Vaccination history; Medical/treatment/drug history</p> |
|--|-----------------------------------------------------------------------------------------------------------------------------------------------------------------------------------------------------------------------------------------------------------------------------------------------------------------------------------------------------------------------------------------------------------------------------------------------------------------------------------------------------------------------------------------------------------------------------------------------------------------------------------------------------------------------------------------------|

For peer review only

1  
2  
3 **Acknowledgements:** We are grateful to our funders and the HeLTI Council for their  
4 support. We are indebted to the local community for their participation in the study. We  
5 acknowledge the role of the WHO in supporting the HeLTI collaboration and providing quality  
6 assurance support. We also thank the HeLTI PI Research Committee and HeLTI Research  
7 Office for the mutual support, intellectual contributions and administrative support.  
8 Elena M. Comelli holds the Lawson Family Chair in Microbiome Nutrition Research at the  
9 University of Toronto.  
10

11 **Authors' contributions:** KK, GVK, KGS, MPP, AB, SA, RB, RHJB, ZAB, GRC, EMC, STD,  
12 CLD, GLH, PJ, KSJ, SRJ, MK, KL, SL, PM, PN, VP, SP, HSS, SAS, NS, JT, CSY, JB, MB,  
13 MCM, NH, DS, CHDF, PSS, and SGM contributed to the conception of the study, study  
14 design, and development of the protocol. KK, GVK, KGS, MPP, DS, CHDF, PSS and SGM  
15 wrote the first draft of the manuscript. AB, SA, RB, RHJB, ZAB, GRC, EMC, STD, CLD,  
16 GLH, PJ, KSJ, SRJ, MK, KL, SL, PM, PN, VP, SP, HSS, SAS, NS, JT, CSY, JB, MB, MCM,  
17 and NH critically reviewed the manuscript and contributed to subsequent drafts. All authors  
18 approved the final version.  
19

20  
21 **Competing interests statement:** None of the authors declare any conflict of interest. The  
22 HeLTI Council of funders and WHO have required all Principal Investigators to complete  
23 annual Declarations of Interest and to commit to having no direct or indirect relations with the  
24 tobacco, arms and infant food industries during the course of the study.  
25

26 **Funding statement:** This work is supported by the Department of Biotechnology,  
27 Government of India (BT/MED/WHO-CIHR/2014) and the Canadian Institutes of Health  
28 Research (NDN-151554). The lead institutes are the CSI Holdsworth Memorial Hospital,  
29 Mysore, India and the University of Toronto, Canada. The funders and sponsors have no  
30 direct involvement in the design and conduct of the study.  
31

32  
33 **Data sharing and access:** Data sharing and access arrangements are included in the  
34 overall HeLTI governance document. The HeLTI consortium is in the process of establishing  
35 a Data Access Portal through which investigators can view and request access to  
36 data/biospecimens within individual HeLTI country or multiple country datasets. Data access  
37 will follow country-specific guidelines and is expected to require submission of a detailed  
38 research plan (including study rationale, hypothesis, analytic methodologies and funding  
39 support to complete the study/analyses). Once the study is completed the researchers will  
40 be required to submit all analytical and derived data with metadata to be integrated into the  
41 HeLTI country datasets, so that it is available to other researchers.  
42  
43  
44  
45  
46  
47  
48  
49  
50  
51  
52  
53  
54  
55  
56  
57  
58  
59  
60

## References

1. GBD 2015 Mortality and Causes of Death Collaborators. Global, regional, and national life expectancy, all-cause mortality, and cause-specific mortality for 249 causes of death, 1980–2015: a systematic analysis for the Global Burden of Disease Study 2015. *Lancet* 2016; **388**: 1459–1544.
2. Ng M, Fleming T, Robinson M *et al*. Global, regional, and national prevalence of overweight and obesity in children and adults during 1980–2013: a systematic analysis for the Global Burden of Disease Study 2013. *Lancet* 2014; **384**: 766–81.
3. NCD Risk Factor Collaboration. Worldwide trends in diabetes since 1980: a pooled analysis of 751 population-based studies with 4.4 million participants. *Lancet* 2016; **387**: 1513–30.
4. Patel V, Simon G, Chowdhary N *et al*. Packages of care for depression in low- and middle-income countries. *PLoS Med* 2009; **6**: e1000159.
5. Mathers CD, Loncar D. Projections of Global Mortality and Burden of Disease from 2002 to 2030. *PLoS Med* 2016; **3**: e442.
6. Guariguata L, Whiting DR, Hambleton I *et al*. Global estimates of diabetes prevalence for 2013 and projections for 2035. *Diabetes Res Clin Pract* 2014; **103**: 137–49.
7. Anjana RM, Pradeepa R, Deepa M *et al*. Prevalence of diabetes and prediabetes (impaired fasting glucose and/or impaired glucose tolerance) in urban and rural India: phase I results of the Indian Council of Medical Research-India DIABetes (ICMR-INDIAB) study. *Diabetologia* 2011; **54**: 3022–7.
8. Patel V, Flisher AJ, Hetrick S, McGarry P. Mental health of young people: a global public-health challenge. *Lancet* 2007; **369**: 1302–13.
9. Prince M, Bryce R, Albanese E *et al*. The global prevalence of dementia: a systematic review and meta-analysis. *Alzheimer's & Dementia* 2013; **9**: 63–75.
10. Kapur A. Economic analysis of diabetes care. *Indian J Med Res* 2007; **125**: 473–82.
11. Shaji KS, Jotheeswaran AT, Girish N *et al*. The Dementia India Report: 2010. Alzheimer's and Related Disorders Society: New Delhi, India.
12. Hales CN, Barker DJP. Type 2 (non-insulin-dependent) diabetes mellitus: the thrifty phenotype hypothesis. *Int J Epidemiol* 2013; **42**: 1215–22.
13. Hanson M, Gluckman P. Developmental origins of noncommunicable disease: population and public health implications. *Am J Clin Nutr* 2011; **94**: 1754S–1758S.
14. Wells JC, Pomeroy E, Walimbe SR, Popkin BM, Yajnik CS. The Elevated Susceptibility to Diabetes in India: An Evolutionary Perspective. *Front Public Health* 2016; **4**: 145.
15. Barker DJ, Osmond C, Kajantie E *et al*. Growth and chronic disease: findings in the Helsinki Birth Cohort. *Ann Hum Biol* 2009; **36**: 445–58.
16. Bhargava SK, Sachdev HS, Fall CH, *et al*. Relation of serial changes in childhood body-mass index to impaired glucose tolerance in young adulthood. *N Engl J Med*. 2004; **350**: 865–75.
17. Ministry of Health and Family Welfare (MoHFW), Government of India, UNICEF and Population Council. 2019. Comprehensive National Nutrition Survey (CNNS) National Report. New Delhi.
18. International Institute for Population Sciences (IIPS) and ICF. 2017. National Family Health Survey (NFHS-4), 2015–16: India. Mumbai: IIPS.
19. India State-Level Disease Burden Initiative Malnutrition Collaborators. The burden of child and maternal malnutrition and trends in its indicators in the states of India: the Global Burden of Disease Study 1990–2017. *Lancet Child Adolesc Health* 2019; **3**: 855–70
20. Yajnik CS, Fall CHD, Koyaji K *et al*. Yajnik, C., Fall, C., Coyaji, K. *et al*. Neonatal anthropometry: the thin-fat Indian baby. The Pune Maternal Nutrition Study. *Int J Obes* **27**, 173–180 (2003). Neonatal anthropometry: the thin-fat Indian baby. The Pune Maternal Nutrition Study. *Int J Obes* 2003; **27**: 173–80.
21. Krishnaveni GV, Hill JC, Veena SR *et al*. Truncal adiposity is present at birth and in early childhood in South Indian children. *Indian Pediatrics* 2005; **42**: 537–

- 1  
2  
3 22. Barker DJP, Osmond C, Kajantie E *et al*. Growth and chronic disease: findings in the  
4 Helsinki Birth Cohort. *Ann Hum Biol* 2009; **36**: 445-58.  
5 23. International Institute for Population Sciences (IIPS) and ICF. 2017. National Family  
6 Health Survey (NFHS-4), 2015-16: India. District Fact Sheet, Mysore, Karnataka. Mumbai:  
7 IIPS.  
8 24. International Institute for Population Sciences (IIPS) and ICF. 2017. National Family  
9 Health Survey (NFHS-4), 2015-16: India. State Fact Sheet, Karnataka. Mumbai: IIPS.  
10 25. Lawrence W, Black C, Tinati T *et al*. Making every contact count: evaluation of the  
11 impact of an intervention to train health and social care practitioners in skills to support  
12 health behaviour change. *J Health Psychol* 2016. **21**: 138–51.  
13 26. Rahman A, Malik A, Sikander S *et al*. Cognitive behaviour therapy-based intervention by  
14 community health workers for mothers with depression and their infants in rural Pakistan: a  
15 cluster-randomised controlled trial. *Lancet* 2008; **72**: 902-9.  
16 27. Rahman A, Iqbal Z, Roberts C *et al*. Cluster randomized trial of a parent-based  
17 intervention to support early development of children in a low-income country. *Child Care*  
18 *Health Dev* 2009; **35**: 56-62.  
19 28. Bhutta ZA, Das JK, Rizvi A *et al*. The Lancet Nutrition Interventions Review Group, and  
20 The Maternal and Child Health Study Group. Evidence-based interventions for improvement  
21 of maternal and child nutrition: what can be done and at what cost? *Lancet* 2013;**382**:452-  
22 77.  
23 29. Bhutta ZA, Haider BA. Maternal micronutrient supplementation for women during  
24 pregnancy. *Cochrane Database Syst Rev* 2015;**11**:CD004905.  
25  
26  
27  
28  
29  
30  
31  
32  
33  
34  
35  
36  
37  
38  
39  
40  
41  
42  
43  
44  
45  
46  
47  
48  
49  
50  
51  
52  
53  
54  
55  
56  
57  
58  
59  
60



## **Appendix 1: HeLTI India (EINSTEIN) Group Work Principles**

**Intended beneficiaries:** Community health workers (CHWs), based at Vivekananda Memorial Hospital will facilitate a series of peer group discussion and learning sessions among all women enrolled into the intervention arms, i.e. the pre-conception and pregnancy arms (and no peer support intervention will be delivered to participants allocated to the control arm).

**Components:** The peer support “package” will consist of:

- (i) Sequential facilitation of 6 pre-conceptual, 5 pregnancy and 5 post-natal timed & targeted content modules by trained CHWs
- (ii) Training and refresher sessions for CHWs on Healthy conversation skills (HCS), Learning Through Play Plus (LTP+), and intervention modules facilitation, conducted by trainers from CSI Holdsworth Memorial Hospital
- (iii) Regular observation and supportive supervision of CHWs by Quality Control teams and field supervisors/manager.

**Materials:** Participants each receive a *personalized* pictorial resource/work booklet for the whole set of sessions.

CHW will receive resource guides, attendance and delivery log sheets, and reflection report guides.

**Logistics:** Peer support groups will be convened in groups of up to 10-12, for delivery each month. In each intervention village/cluster there may be ~30 women enrolled at the beginning, so there will be multiple peer groups per cluster. As more women are enrolled as they become eligible, the groups may increase. After enrollment and baseline data collection (including biospecimens), the initial session will be conducted by a CHW ~2-4 weeks later. Subsequent sessions will be conducted on a “timed and targeted” schedule roughly every month.

**Rationale and process of development:** The primary topics and specific content mix for each session were developed based on:

- Context of existing services, if any
- Alignment with key goals of the study
- Prioritisation of women’s health needs, identified with key stakeholder consultations
- Feedback from initial community engagements (e.g. people recognised that they won’t benefit and changes won’t be immediate, will benefit future generations, their children).

Spillover chances/potential contamination, although possible, are considered low because of the:

- Individual nature of intervention (including booklet materials being personalized)
- Peers support group discussions are private, small-scale

- 1  
2  
3 - Limited social media.  
4  
5

6 Guiding principles of the peer group sessions:  
7

- 8 - Empowering women participants  
9 - Timed and targeted to reproductive stage  
10 - Integrated with HCS approach  
11 - Topical mix packaged unconventionally, but coherently from participant perspectives  
12 - Ground-truthed, using formative research and pre-testing  
13 - Cyclicity, with short enough amplitude for re-exposure during a pregnancy  
14 - Leverages/integrates existing local, state, national assets (e.g. teaching materials,  
15 best practice guidelines) and solutions (e.g locally available foods, recipes, resources,  
16 etc)  
17 - Addressing barriers and beliefs, myths (e.g. eating down, transport fears, etc  
18 - Offer training to all health workers, eg. bioethics to ensure equity  
19  
20  
21  
22

23 Every session is structured to:  
24

- 25 - Engage participants with their own assessment of salient health needs and solutions  
26 - Provide new information about relevant indicators for the community, specific  
27 illness threats to women and children, and about healthy options and local solutions  
28 to adopt  
29 - Provide a sample commodity or referral resource, that can be sustainable through  
30 subsequent participant choices  
31 - Provide a self-reflection or self-monitoring opportunity for review in the next session  
32  
33  
34

35 Final versions of the materials and mode of delivery developed in consultation with:  
36

- 37 - PIs and co-PIs  
38 - Other team members  
39 - Selected group of CHWs  
40 - Selected group of women (potential participants).  
41  
42  
43  
44  
45  
46  
47  
48  
49  
50  
51  
52  
53  
54  
55  
56  
57  
58  
59  
60

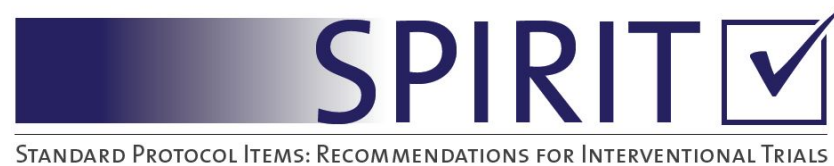

SPIRIT 2013 Checklist: Recommended items to address in a clinical trial protocol and related documents\*

| Section/item                      | Item No | Description                                                                                                                                                                                                                                                                              | Addressed on page number |
|-----------------------------------|---------|------------------------------------------------------------------------------------------------------------------------------------------------------------------------------------------------------------------------------------------------------------------------------------------|--------------------------|
| <b>Administrative information</b> |         |                                                                                                                                                                                                                                                                                          |                          |
| Title                             | 1       | Descriptive title identifying the study design, population, interventions, and, if applicable, trial acronym                                                                                                                                                                             | __1__                    |
| Trial registration                | 2a      | Trial identifier and registry name. If not yet registered, name of intended registry                                                                                                                                                                                                     | _CTRI and<br>ISRCTN_     |
|                                   | 2b      | All items from the World Health Organization Trial Registration Data Set                                                                                                                                                                                                                 | __NA__                   |
| Protocol version                  | 3       | Date and version identifier                                                                                                                                                                                                                                                              | __NA__                   |
| Funding                           | 4       | Sources and types of financial, material, and other support                                                                                                                                                                                                                              | __14__                   |
| Roles and responsibilities        | 5a      | Names, affiliations, and roles of protocol contributors                                                                                                                                                                                                                                  | __1, 14__                |
|                                   | 5b      | Name and contact information for the trial sponsor                                                                                                                                                                                                                                       | __14__                   |
|                                   | 5c      | Role of study sponsor and funders, if any, in study design; collection, management, analysis, and interpretation of data; writing of the report; and the decision to submit the report for publication, including whether they will have ultimate authority over any of these activities | __14__                   |
|                                   | 5d      | Composition, roles, and responsibilities of the coordinating centre, steering committee, endpoint adjudication committee, data management team, and other individuals or groups overseeing the trial, if applicable (see Item 21a for data monitoring committee)                         | __6, 14__                |

1 **Introduction**

2

3 Background and rationale 6a Description of research question and justification for undertaking the trial, including summary of relevant studies (published and unpublished) examining benefits and harms for each intervention \_\_\_\_\_ 5-6 \_\_\_\_\_

4

5

6 6b Explanation for choice of comparators \_\_\_\_\_ 7-8 \_\_\_\_\_

7

8 Objectives 7 Specific objectives or hypotheses \_\_\_\_\_ 6-7 \_\_\_\_\_

9

10 Trial design 8 Description of trial design including type of trial (eg, parallel group, crossover, factorial, single group), allocation ratio, and framework (eg, superiority, equivalence, noninferiority, exploratory) \_\_\_\_\_ 7 \_\_\_\_\_

11

12

13

14 **Methods: Participants, interventions, and outcomes**

15

16 Study setting 9 Description of study settings (eg, community clinic, academic hospital) and list of countries where data will be collected. Reference to where list of study sites can be obtained \_\_\_\_\_ 6-7 \_\_\_\_\_

17

18

19 Eligibility criteria 10 Inclusion and exclusion criteria for participants. If applicable, eligibility criteria for study centres and individuals who will perform the interventions (eg, surgeons, psychotherapists) \_\_\_\_\_ 6-7 \_\_\_\_\_

20

21

22 Interventions 11a Interventions for each group with sufficient detail to allow replication, including how and when they will be administered \_\_\_\_\_ 7-8 \_\_\_\_\_

23

24

25 11b Criteria for discontinuing or modifying allocated interventions for a given trial participant (eg, drug dose change in response to harms, participant request, or improving/worsening disease) \_\_\_\_\_ 7-8; 10 \_\_\_\_\_

26

27

28 11c Strategies to improve adherence to intervention protocols, and any procedures for monitoring adherence (eg, drug tablet return, laboratory tests) \_\_\_\_\_ 10-11 \_\_\_\_\_

29

30

31 11d Relevant concomitant care and interventions that are permitted or prohibited during the trial \_\_\_\_\_ 7-8 \_\_\_\_\_

32

33

34 Outcomes 12 Primary, secondary, and other outcomes, including the specific measurement variable (eg, systolic blood pressure), analysis metric (eg, change from baseline, final value, time to event), method of aggregation (eg, median, proportion), and time point for each outcome. Explanation of the clinical relevance of chosen efficacy and harm outcomes is strongly recommended \_\_\_\_\_ 8 \_\_\_\_\_

35

36

37

38

39

40 Participant timeline 13 Time schedule of enrolment, interventions (including any run-ins and washouts), assessments, and visits for participants. A schematic diagram is highly recommended (see Figure) \_\_\_\_\_ 8; 12-13 \_\_\_\_\_

41

42

1 Sample size 14 Estimated number of participants needed to achieve study objectives and how it was determined, including \_\_\_\_\_ 8-9 \_\_\_\_\_  
 2 clinical and statistical assumptions supporting any sample size calculations

3  
 4 Recruitment 15 Strategies for achieving adequate participant enrolment to reach target sample size \_\_\_\_\_ 9; 10-11 \_\_\_\_\_  
 5

6  
 7 **Methods: Assignment of interventions (for controlled trials)**

8 Allocation:  
 9

10 Sequence 16a Method of generating the allocation sequence (eg, computer-generated random numbers), and list of any \_\_\_\_\_ 7 \_\_\_\_\_  
 11 generation factors for stratification. To reduce predictability of a random sequence, details of any planned restriction  
 12 (eg, blocking) should be provided in a separate document that is unavailable to those who enrol participants  
 13 or assign interventions  
 14

15  
 16 Allocation 16b Mechanism of implementing the allocation sequence (eg, central telephone; sequentially numbered, \_\_\_\_\_ 7 \_\_\_\_\_  
 17 concealment opaque, sealed envelopes), describing any steps to conceal the sequence until interventions are assigned  
 18 mechanism  
 19

20 Implementation 16c Who will generate the allocation sequence, who will enrol participants, and who will assign participants to \_\_\_\_\_ 7-8 \_\_\_\_\_  
 21 interventions  
 22

23  
 24 Blinding (masking) 17a Who will be blinded after assignment to interventions (eg, trial participants, care providers, outcome \_\_\_\_\_ 9 \_\_\_\_\_  
 25 assessors, data analysts), and how  
 26

27 17b If blinded, circumstances under which unblinding is permissible, and procedure for revealing a participant's \_\_\_\_\_ 9 \_\_\_\_\_  
 28 allocated intervention during the trial  
 29  
 30

31 **Methods: Data collection, management, and analysis**

32  
 33 Data collection 18a Plans for assessment and collection of outcome, baseline, and other trial data, including any related \_\_\_\_\_ 8, 12-13 \_\_\_\_\_  
 34 methods processes to promote data quality (eg, duplicate measurements, training of assessors) and a description of  
 35 study instruments (eg, questionnaires, laboratory tests) along with their reliability and validity, if known.  
 36 Reference to where data collection forms can be found, if not in the protocol  
 37

38  
 39 18b Plans to promote participant retention and complete follow-up, including list of any outcome data to be \_\_\_\_\_ 9-10 \_\_\_\_\_  
 40 collected for participants who discontinue or deviate from intervention protocols  
 41  
 42

|    |                                 |     |                                                                                                                                                                                                                                                                                                                                       |               |
|----|---------------------------------|-----|---------------------------------------------------------------------------------------------------------------------------------------------------------------------------------------------------------------------------------------------------------------------------------------------------------------------------------------|---------------|
| 1  | Data management                 | 19  | Plans for data entry, coding, security, and storage, including any related processes to promote data quality (eg, double data entry; range checks for data values). Reference to where details of data management procedures can be found, if not in the protocol                                                                     | ___ 9-11 ___  |
| 2  |                                 |     |                                                                                                                                                                                                                                                                                                                                       |               |
| 3  |                                 |     |                                                                                                                                                                                                                                                                                                                                       |               |
| 4  |                                 |     |                                                                                                                                                                                                                                                                                                                                       |               |
| 5  | Statistical methods             | 20a | Statistical methods for analysing primary and secondary outcomes. Reference to where other details of the statistical analysis plan can be found, if not in the protocol                                                                                                                                                              | ___ 9-10 ___  |
| 6  |                                 |     |                                                                                                                                                                                                                                                                                                                                       |               |
| 7  |                                 |     |                                                                                                                                                                                                                                                                                                                                       |               |
| 8  |                                 | 20b | Methods for any additional analyses (eg, subgroup and adjusted analyses)                                                                                                                                                                                                                                                              | ___ 9-10 ___  |
| 9  |                                 |     |                                                                                                                                                                                                                                                                                                                                       |               |
| 10 |                                 | 20c | Definition of analysis population relating to protocol non-adherence (eg, as randomised analysis), and any statistical methods to handle missing data (eg, multiple imputation)                                                                                                                                                       | ___ 9-10 ___  |
| 11 |                                 |     |                                                                                                                                                                                                                                                                                                                                       |               |
| 12 |                                 |     |                                                                                                                                                                                                                                                                                                                                       |               |
| 13 |                                 |     |                                                                                                                                                                                                                                                                                                                                       |               |
| 14 | <b>Methods: Monitoring</b>      |     |                                                                                                                                                                                                                                                                                                                                       |               |
| 15 |                                 |     |                                                                                                                                                                                                                                                                                                                                       |               |
| 16 | Data monitoring                 | 21a | Composition of data monitoring committee (DMC); summary of its role and reporting structure; statement of whether it is independent from the sponsor and competing interests; and reference to where further details about its charter can be found, if not in the protocol. Alternatively, an explanation of why a DMC is not needed | ___ 6 ___     |
| 17 |                                 |     |                                                                                                                                                                                                                                                                                                                                       |               |
| 18 |                                 |     |                                                                                                                                                                                                                                                                                                                                       |               |
| 19 |                                 |     |                                                                                                                                                                                                                                                                                                                                       |               |
| 20 |                                 |     |                                                                                                                                                                                                                                                                                                                                       |               |
| 21 |                                 |     |                                                                                                                                                                                                                                                                                                                                       |               |
| 22 |                                 | 21b | Description of any interim analyses and stopping guidelines, including who will have access to these interim results and make the final decision to terminate the trial                                                                                                                                                               | ___ 6, 9 ___  |
| 23 |                                 |     |                                                                                                                                                                                                                                                                                                                                       |               |
| 24 |                                 |     |                                                                                                                                                                                                                                                                                                                                       |               |
| 25 | Harms                           | 22  | Plans for collecting, assessing, reporting, and managing solicited and spontaneously reported adverse events and other unintended effects of trial interventions or trial conduct                                                                                                                                                     | ___ 10-11 ___ |
| 26 |                                 |     |                                                                                                                                                                                                                                                                                                                                       |               |
| 27 |                                 |     |                                                                                                                                                                                                                                                                                                                                       |               |
| 28 | Auditing                        | 23  | Frequency and procedures for auditing trial conduct, if any, and whether the process will be independent from investigators and the sponsor                                                                                                                                                                                           | ___ 6 ___     |
| 29 |                                 |     |                                                                                                                                                                                                                                                                                                                                       |               |
| 30 |                                 |     |                                                                                                                                                                                                                                                                                                                                       |               |
| 31 |                                 |     |                                                                                                                                                                                                                                                                                                                                       |               |
| 32 | <b>Ethics and dissemination</b> |     |                                                                                                                                                                                                                                                                                                                                       |               |
| 33 |                                 |     |                                                                                                                                                                                                                                                                                                                                       |               |
| 34 | Research ethics approval        | 24  | Plans for seeking research ethics committee/institutional review board (REC/IRB) approval                                                                                                                                                                                                                                             | ___ 10 ___    |
| 35 |                                 |     |                                                                                                                                                                                                                                                                                                                                       |               |
| 36 |                                 |     |                                                                                                                                                                                                                                                                                                                                       |               |
| 37 | Protocol amendments             | 25  | Plans for communicating important protocol modifications (eg, changes to eligibility criteria, outcomes, analyses) to relevant parties (eg, investigators, REC/IRBs, trial participants, trial registries, journals, regulators)                                                                                                      | ___ 10 ___    |
| 38 |                                 |     |                                                                                                                                                                                                                                                                                                                                       |               |
| 39 |                                 |     |                                                                                                                                                                                                                                                                                                                                       |               |
| 40 |                                 |     |                                                                                                                                                                                                                                                                                                                                       |               |
| 41 |                                 |     |                                                                                                                                                                                                                                                                                                                                       |               |
| 42 |                                 |     |                                                                                                                                                                                                                                                                                                                                       |               |
| 43 |                                 |     |                                                                                                                                                                                                                                                                                                                                       |               |
| 44 |                                 |     |                                                                                                                                                                                                                                                                                                                                       |               |
| 45 |                                 |     |                                                                                                                                                                                                                                                                                                                                       |               |
| 46 |                                 |     |                                                                                                                                                                                                                                                                                                                                       |               |

|    |                               |     |                                                                                                                                                                                                                                                                                     |                                                          |
|----|-------------------------------|-----|-------------------------------------------------------------------------------------------------------------------------------------------------------------------------------------------------------------------------------------------------------------------------------------|----------------------------------------------------------|
| 1  | Consent or assent             | 26a | Who will obtain informed consent or assent from potential trial participants or authorised surrogates, and how (see Item 32)                                                                                                                                                        | _____10-11_____                                          |
| 2  |                               |     |                                                                                                                                                                                                                                                                                     |                                                          |
| 3  |                               |     |                                                                                                                                                                                                                                                                                     |                                                          |
| 4  |                               | 26b | Additional consent provisions for collection and use of participant data and biological specimens in ancillary studies, if applicable                                                                                                                                               | _____10-11_____                                          |
| 5  |                               |     |                                                                                                                                                                                                                                                                                     |                                                          |
| 6  |                               |     |                                                                                                                                                                                                                                                                                     |                                                          |
| 7  | Confidentiality               | 27  | How personal information about potential and enrolled participants will be collected, shared, and maintained in order to protect confidentiality before, during, and after the trial                                                                                                | _____11_____                                             |
| 8  |                               |     |                                                                                                                                                                                                                                                                                     |                                                          |
| 9  |                               |     |                                                                                                                                                                                                                                                                                     |                                                          |
| 10 | Declaration of interests      | 28  | Financial and other competing interests for principal investigators for the overall trial and each study site                                                                                                                                                                       | _____14_____                                             |
| 11 |                               |     |                                                                                                                                                                                                                                                                                     |                                                          |
| 12 |                               |     |                                                                                                                                                                                                                                                                                     |                                                          |
| 13 | Access to data                | 29  | Statement of who will have access to the final trial dataset, and disclosure of contractual agreements that limit such access for investigators                                                                                                                                     | _____14_____                                             |
| 14 |                               |     |                                                                                                                                                                                                                                                                                     |                                                          |
| 15 |                               |     |                                                                                                                                                                                                                                                                                     |                                                          |
| 16 | Ancillary and post-trial care | 30  | Provisions, if any, for ancillary and post-trial care, and for compensation to those who suffer harm from trial participation                                                                                                                                                       | _____11_____                                             |
| 17 |                               |     |                                                                                                                                                                                                                                                                                     |                                                          |
| 18 |                               |     |                                                                                                                                                                                                                                                                                     |                                                          |
| 19 |                               |     |                                                                                                                                                                                                                                                                                     |                                                          |
| 20 | Dissemination policy          | 31a | Plans for investigators and sponsor to communicate trial results to participants, healthcare professionals, the public, and other relevant groups (eg, via publication, reporting in results databases, or other data sharing arrangements), including any publication restrictions | _____10-11_____                                          |
| 21 |                               |     |                                                                                                                                                                                                                                                                                     |                                                          |
| 22 |                               |     |                                                                                                                                                                                                                                                                                     |                                                          |
| 23 |                               |     |                                                                                                                                                                                                                                                                                     |                                                          |
| 24 |                               | 31b | Authorship eligibility guidelines and any intended use of professional writers                                                                                                                                                                                                      | _____N/A (separate publication policy within consortium) |
| 25 |                               |     |                                                                                                                                                                                                                                                                                     |                                                          |
| 26 |                               |     |                                                                                                                                                                                                                                                                                     |                                                          |
| 27 |                               |     |                                                                                                                                                                                                                                                                                     |                                                          |
| 28 |                               |     |                                                                                                                                                                                                                                                                                     |                                                          |
| 29 |                               | 31c | Plans, if any, for granting public access to the full protocol, participant-level dataset, and statistical code                                                                                                                                                                     | _____14_____                                             |
| 30 |                               |     |                                                                                                                                                                                                                                                                                     |                                                          |
| 31 | <b>Appendices</b>             |     |                                                                                                                                                                                                                                                                                     |                                                          |
| 32 |                               |     |                                                                                                                                                                                                                                                                                     |                                                          |
| 33 | Informed consent materials    | 32  | Model consent form and other related documentation given to participants and authorised surrogates                                                                                                                                                                                  | _____N/A (available on request)_____                     |
| 34 |                               |     |                                                                                                                                                                                                                                                                                     |                                                          |
| 35 |                               |     |                                                                                                                                                                                                                                                                                     |                                                          |
| 36 |                               |     |                                                                                                                                                                                                                                                                                     |                                                          |
| 37 |                               |     |                                                                                                                                                                                                                                                                                     |                                                          |
| 38 | Biological specimens          | 33  | Plans for collection, laboratory evaluation, and storage of biological specimens for genetic or molecular analysis in the current trial and for future use in ancillary studies, if applicable                                                                                      | _____N/A (available on request)_____                     |
| 39 |                               |     |                                                                                                                                                                                                                                                                                     |                                                          |
| 40 |                               |     |                                                                                                                                                                                                                                                                                     |                                                          |
| 41 |                               |     |                                                                                                                                                                                                                                                                                     |                                                          |

1  
2  
3  
4  
5  
6  
7  
8  
9  
10  
11  
12  
13  
14  
15  
16  
17  
18  
19  
20  
21  
22  
23  
24  
25  
26  
27  
28  
29  
30  
31  
32  
33  
34  
35  
36  
37  
38  
39  
40  
41  
42  
43  
44  
45  
46

\*It is strongly recommended that this checklist be read in conjunction with the SPIRIT 2013 Explanation & Elaboration for important clarification on the items. Amendments to the protocol should be tracked and dated. The SPIRIT checklist is copyrighted by the SPIRIT Group under the Creative Commons "[Attribution-NonCommercial-NoDerivs 3.0 Unported](#)" license.

For peer review only
