# Supplementary material for: Protocol for a cluster randomised trial evaluating a multifaceted intervention starting preconceptionally—Early Interventions to Support Trajectories for Healthy Life in India (EINSTEIN): a Healthy Life Trajectories Initiative (HeLTI) Study
Source: PubMed Central journal article supplement — BMJ Open. 2021 Feb 16;11(2):e045862. doi: 10.1136/bmjopen-2020-045862 (PMC7888364; doi:10.1136/bmjopen-2020-045862), 2021-02-16
Supplement: bmjopen-2020-045862.reviewer_comments.pdf [file bmjopen-2020-045862.reviewer_comments.pdf]

## PEER REVIEW HISTORY

BMJ Open publishes all reviews undertaken for accepted manuscripts. Reviewers are asked to complete a checklist review form (<http://bmjopen.bmj.com/site/about/resources/checklist.pdf>) and are provided with free text boxes to elaborate on their assessment. These free text comments are reproduced below.

## ARTICLE DETAILS

|                            |                                                                                                                                                                                                                                                                                                                                                                                                                                                                                                                                                                                                                                                                                |
|----------------------------|--------------------------------------------------------------------------------------------------------------------------------------------------------------------------------------------------------------------------------------------------------------------------------------------------------------------------------------------------------------------------------------------------------------------------------------------------------------------------------------------------------------------------------------------------------------------------------------------------------------------------------------------------------------------------------|
| <b>TITLE (PROVISIONAL)</b> | Protocol for a cluster randomised trial evaluating a multi-faceted intervention starting preconceptionally - Early Interventions to Support Trajectories for Healthy Life in India (EINSTEIN). A Healthy Life Trajectories Initiative (HeLTI) Study.                                                                                                                                                                                                                                                                                                                                                                                                                           |
| <b>AUTHORS</b>             | Kumaran, Kalyanaraman; Krishnaveni, Ghattu; Suryanarayana, Kumar; Prasad, Manohar; Antonisamy, Belavendra; Atkinson, S; Balasubramaniam, Ramaswamy; Bandsma, Robert; Bhutta, Zulfiqar; Chandak, Giriraj; Comelli, Elena; Davidge, Sandra; Dennis, CindyLee; Hammond, Geoffrey; Jha, Prabhat; Joseph, K.; Joshi, S; Krishna, Murali; Lee, Kang; Lye, Stephen; McGowan, Patrick; Nepomnaschy, Pablo A.; Padvetnaya, Vivek; Pyne, Saumyadipta; Sachdev, Harshpal; Sahariah, Sirazul; Singhal, Nalini; Trasler, Jacquetta; Yajnik, Chittaranjan; Baird, Janis; Barker, Mary; Martin, Marie-Claude; Husain, Nusrat; Sellen, Daniel; Fall, Caroline; Shah, Prakesh; Mathews, Stephen |

This article was not externally reviewed at BMJ Open. Protocols that have been independently assessed prior to submission to BMJ Open are usually fast-tracked to publication on the grounds that further substantial changes will not be possible. This independent assessment will usually be external, independent review for both a substantial grant award from a non-commercial or government funder and ethics approval.
